1 **Multi-omics analysis identifies a *CYP9K1* haplotype conferring pyrethroid**  
2 **resistance in the malaria vector *Anopheles funestus* in East Africa**

3

4 Jack Hearn<sup>1\*</sup>, Carlos Djoko Tagne<sup>2</sup>, Sulaiman S. Ibrahim<sup>1</sup>, Billy Tene-Fossog<sup>2</sup>, Leon  
5 J. Mugenzi<sup>2,3</sup>, Helen Irving<sup>1</sup>, Jacob M. Riveron<sup>1</sup>, G.D. Weedall<sup>4</sup> and C.S. Wondji<sup>1,2\*</sup>

6

7

8 <sup>1</sup>Vector Biology Department, Liverpool School of Tropical Medicine, Pembroke Place,  
9 Liverpool L3 5QA, UK.

10 <sup>2</sup>LSTM Research Unit, Centre for Research in Infectious Diseases (CRID), P.O. Box  
11 13591, Yaoundé, Cameroon

12 <sup>3</sup>Department of Biochemistry, Faculty of Science, University of Bamenda, P.O. Box 39  
13 Bambili, Bamenda, Cameroon

14 <sup>4</sup>School of Biological and Environmental Sciences, Liverpool John Moores University,  
15 Byrom Street, Liverpool L3 3AF, UK.

16

17

18 \* To whom correspondence should be addressed Email: [jack.hearn@lstmed.ac.uk](mailto:jack.hearn@lstmed.ac.uk);

19 [Charles.Wondji@lstmed.ac.uk](mailto:Charles.Wondji@lstmed.ac.uk)

20

21

22 **Abstract**

23

24 Metabolic resistance to pyrethroids is a menace to the continued effectiveness of  
25 malaria vector controls. Its molecular basis is complex and varies geographically  
26 across Africa. Here, we used a multi-omics approach, followed-up with functional  
27 validation to show that a directionally selected haplotype of a cytochrome P450,  
28 *CYP9K1* is a major driver of resistance in *Anopheles funestus*.

29

30 A PoolSeq GWAS using mosquitoes alive and dead after permethrin exposure, from  
31 Malawi and Cameroon, detected candidate genomic regions, but lacked consistency  
32 across replicates. Targeted deep sequencing of candidate resistance genes and  
33 genomic loci detected several SNPs associated with known pyrethroid resistance  
34 QTLs. The most significant SNP was in the cytochrome P450 *CYP304B1* (Cameroon),  
35 *CYP315A1* (Uganda) and the ABC transporter gene ABCG4 (Malawi). However, when  
36 comparing field resistant mosquitoes to laboratory susceptible, the pyrethroid  
37 resistance locus *rp1* and SNPs around the ABC transporter ABCG4 were consistently  
38 significant, except for Uganda where *CYP9K1* P450 was markedly significant. *In vitro*  
39 heterologous metabolism assays with recombinant CYP9K1 revealed that it  
40 metabolises type II pyrethroid (deltamethrin; 64% depletion) but not type I (permethrin;  
41 0%), while moderately metabolising DDT (17%). *CYP9K1* exhibited a drastic reduction  
42 of genetic diversity in Uganda, in contrast to other locations, highlighting an extensive  
43 selective sweep. Furthermore, a glycine to alanine (G454A) amino acid mutation  
44 located between the meander and cysteine pocket of *CYP9K1* was detected in all  
45 Ugandan mosquitoes.

46

47 This study sheds further light on the complex evolution of metabolic resistance in a  
48 major malaria vector, by adding further resistance genes and variants that can be used  
49 to design field applicable markers to better track this resistance Africa-wide.

50

## 51 **Author Summary**

52

53 Metabolic resistance to pyrethroids is a menace to the continued effectiveness of  
54 malaria vector controls. Its molecular basis is complex and varies geographically  
55 across Africa. Here, we used several DNA based approach to associate genomic  
56 differences between resistant and susceptible mosquitoes from several field and  
57 laboratory populations of the malaria vector *Anopheles funestus*. We followed-up our  
58 genomic analyses with functional validation of a candidate resistance gene in East  
59 Africa. This gene (*CYP9K1*) is a member of the cytochrome P450 gene-family that  
60 helps to metabolise, and thereby detoxify, pyrethroid insecticides. We show that this  
61 gene is a major driver of resistance to a specific sub-class of pyrethroid insecticides  
62 only, with moderate to no effects on other insecticides used against *Anopheles*  
63 *funestus*. We were able to link resistance in this gene to a mutation that changes the  
64 amino acid glycine to alanine that may impact how the protein-product of this gene  
65 binds to target insecticides. In addition to demonstrating the biochemical specificity of  
66 an evolutionary response, we have broadened the available pool of genes can be used  
67 to monitor the spread of insecticide resistance in this species.

68

69

70

71

## 72 **Introduction**

73

74 Malaria control relies heavily on insecticide-based interventions, notably Long-Lasting  
75 Insecticidal Nets (LLINs) incorporating pyrethroid insecticides, and Indoor Residual  
76 Spraying (IRS). Together, these interventions are credited with a greater than 70%  
77 decrease in malaria burdens since their introduction [1]. However, resistance to  
78 insecticides (notably pyrethroids) is threatening the continued effectiveness of these  
79 tools. Unless resistance to insecticides is managed, the recent gains in reducing  
80 malaria transmission could be lost [2]. Worryingly, several mosquito populations are  
81 developing multiple and cross-resistance to a broad range of insecticides, increasing  
82 the risks that such populations could be better equipped to rapidly develop resistance  
83 to novel classes of insecticides. Therefore, elucidating the genetic basis and evolution  
84 of resistance is crucial to design resistance management strategies and prevent  
85 malaria resurgence [2].

86

87 In the major malaria vector *Anopheles funestus*, metabolic resistance mechanisms are  
88 driving resistance to most insecticides, including pyrethroids [3-5]. The molecular basis  
89 of this resistance however is diverse and complex across Africa, with different  
90 resistance mechanisms spreading, and potentially inter-mixing, from independent  
91 origins [6-10]. These mechanisms are driven by extensive genetic variation between  
92 regions, preventing the use of existing findings to inform control efforts across the  
93 continent. Progress was recently made in this area through the detection of a DNA-  
94 marker in the *cis*-regulatory region of the cytochrome P450 *CYP6P9a* and *CYP6P9b*  
95 allowing the design of DNA-based simple PCR assays for detecting and tracking  
96 pyrethroid resistance in the field [5, 11]. However, this resistance marker only explains

97 resistance in southern Africa as the genetic basis of pyrethroid resistance, and cross-  
98 resistance to other insecticide classes is driven by different genes [5, 9]. This is a major  
99 obstacle in designing effective resistance management strategies across the  
100 continent, to better control this major malaria vector.

101  
102 Transcriptomic analyses have successfully been used to detect key genes conferring  
103 resistance to insecticides in the principal malaria vectors [4, 5, 12]. Despite large scale  
104 whole genome sequencing, it has proven difficult to conclusively associate variants  
105 with resistance. This indicates a need for a combination of sequencing methods  
106 followed by functional validation to detect metabolic resistance markers. Genome wide  
107 association of pooled individuals (GWAS-PoolSeq) has successfully detected  
108 candidate genomic regions of specific phenotypes, including variation in pigmentation  
109 in *Drosophila* [13]. In *An. funestus*, we recently discovered a duplication of the X  
110 chromosome cytochrome P450 *CYP9K1* associated with increased gene expression  
111 using this method [9]. Deep sequencing of target-enriched data has successfully been  
112 implemented to elucidate mechanisms of insecticide resistance in the dengue  
113 mosquito vector, *Aedes aegypti* [14]. Therefore, a GWAS-PoolSeq approach in  
114 tandem with targeted enrichment of candidate genomics regions could offer further  
115 opportunities to elucidate the complexities of metabolic resistance in *An. funestus*,  
116 while also helping to detect causative resistance alleles.

117  
118 Here, we used a multi-omics approach with a GWAS-PoolSeq and target enrichment  
119 with deep sequencing to elucidate the molecular basis of pyrethroid resistance in the  
120 major malaria vector *An. funestus*. We show, using *Escherichia coli* heterologous  
121 expression, that a highly selected allele of the cytochrome P450 gene *CYP9K1* is

122 driving pyrethroid resistance in East Africa with complete fixation in Uganda. *In vitro*  
123 heterologous expression of *CYP9K1* in *E. coli* revealed this P450 capable of efficiently  
124 metabolising the type II pyrethroids deltamethrin.

125

## 126 **Results**

### 127 ***1- Genome-wide association study with pooled mosquitoes to identify allelic*** 128 ***variants putatively associated with permethrin resistance***

129 To detect genetic markers associated with permethrin resistance across the *An.*  
130 *funestus* genome, we carried out a genome-wide association study using pooled  
131 mosquitoes with binary ‘resistant’ or ‘susceptible’ phenotypes. Insecticide exposure  
132 bioassays were performed on susceptible and resistant populations of mosquitoes  
133 from two locations (Malawi and Cameroon) representing Southern and Central Africa,  
134 respectively. The ‘Susceptible’ mosquitoes were those that died after a short exposure  
135 to the insecticide while ‘highly resistant’ mosquitoes survived a long exposure.  
136 Genomic DNA from each mosquito was purified and equal quantities from 40  
137 mosquitoes from each set pooled and whole-genome shotgun sequenced. The  
138 sequence data obtained for each F<sub>1</sub> pool were processed for quality control (trimming,  
139 pair-end) (Table S1) and aligned to the *An. funestus* F3 FUMOZ reference genome  
140 [15]. Allele frequencies were estimated at all variant sites and compared using  
141 pairwise and global F<sub>st</sub> between susceptible/resistant population and a Cochran-  
142 Mantel-Haenszel (CMH) test of association.

143

144 To identify variant sites with allele frequencies significantly associated with the  
145 phenotypes in Malawi [dead (D) after 60 min’ permethrin exposure (n=2 pools) and

146 alive (A) after 180 minutes' permethrin exposure (n=3 pools)], Cochran-Mantel-  
147 Haenszel tests of association and a gene-wise divergence ( $F_{ST}$ ) estimations were  
148 applied to all bi-allelic variant sites. These estimates were plotted as  $-\log_{10}$  P-values  
149 Manhattan plots for 1000 SNP sliding-window global  $F_{st}$ s estimated in the R package  
150 poolstat [16] and Cochran Mantel Tests of association (Figure 1a-b) using  
151 Popoolation2 [17]. GWAS Results were consistent between Cochran-Mantel-  
152 Haenszel (CMH) tests of association and global  $F_{st}$ . For both analyses, a twelve  
153 megabase-long region of elevated  $F_{st}$ / $-\log_{10}$  p-value is observed between 21 and 33  
154 Mb on chromosome 3 in Malawi. This extensive region is annotated with 765 genes  
155 many of which are of unknown function (242) but does include six cuticular genes and  
156 one cytochrome P450 (*CYP301A1*). The average  $F_{st}$  in this region is 0.018 versus a  
157 background of  $F_{st}$  of 0.0005 for chromosome 3. Although a substantial 32-fold  
158 difference in  $F_{st}$  averages, the absolute  $F_{st}$  of this region was low. Furthermore, on  
159 inspection of the pairwise  $F_{st}$  plots (Figure S1), this elevated region was observed in  
160 "Alive1" and "Alive3" versus dead replicates but not for "Alive2" replicates. Two peaks  
161 on Chromosome 2 around positions 95.6 and 97.7 are prominent in the  $F_{st}$  results and  
162 can also be discerned in the CMH plots (Figure 1). The first region of elevated  $F_{st}$  from  
163 positions 95,515,427 to 95,668,792 is composed of 40 genes including *CYP9M1*  
164 (AFUN015938) and *CYP9M2* (AFUN016005). There were also four cellular  
165 retinaldehyde binding proteins, three CRAL-TRIO domain-containing proteins and the  
166 remaining 31 genes lacked annotation. The peak around 97.7Mb did not overlap any  
167 gene but is downstream of the 3' end of gene AFUN003294 which encodes an ETS  
168 family transcriptional repressor. The only other visually concordant region of potential  
169 interest was observed towards the end of the X-chromosome from positions 14.4 to  
170 14.7 mb overlapping four genes including a homolog of 'single-minded' (AFUN005600)

171 and an un-annotated gene (AFUN020237) with homology to '*stasimon*' where local  
172  $F_{st}$  /  $-\log_{10}$  p-values were highest. Although the SNP with the highest CMH  $-\log_{10}$  p-  
173 value is outside of this region at position 14,172,028.

174

175 To test if similar results were observed in Cameroon, an  $F_{st}$  only analysis was  
176 performed as only one Dead and one Alive replicate were sequenced. Background  $F_{st}$   
177 values were low and similar for all three chromosomes at 0.015, 0.015 and 0.017 for  
178 Chromosomes 2, 3 and X respectively (Figure 1c), although several fold larger  
179 background  $F_{st}$ s in the Malawi data. Outliers were few and did not overlap with those  
180 for Malawi. Of those 1000bp blocks with an  $F_{st} > 0.4$  only one contained more than 3  
181 SNPs on Chromosome 2 mid-point 67,266,500 with 6 SNPs. This window did not  
182 overlap with any genes in the *An. funestus* annotation, and the nearest loci are >5 kb  
183 distant in both flanking regions.

184

185 Finally, an inter-country comparison was made by poolstat global  $F_{st}$  and  
186 Popoolation2 CMH test. In contrast to intra-country comparisons a well-defined peak  
187 of differentiation was observed across the *rp1* locus for both analyses (Figure S2). In  
188 addition, the X Chromosome was of elevated background  $F_{st}$  versus autosomes with  
189 average  $F_{st}$  of 0.165 versus 0.062 and 0.056 for Chromosomes 2 and 3 respectively.  
190 Overall, because of the lack of strong candidate resistance variants detected with this  
191 PoolSeq GWAS approach, it was not pursued in other countries, but a fine-scale  
192 approach was employed instead.

193

194 ***3-Detection of variants associated with pyrethroid resistance using targeted***  
195 ***enrichment and deep sequencing***



196

197 To further detect the polymorphisms associated with pyrethroid resistance, a fine-  
198 scale targeted sequencing approach was also used to enrich a portion of the genome  
199 using a portion of the genome of individual mosquitoes. The set of genes targeted  
200 represent many candidate metabolic resistance loci based on the literature  
201 (detoxification genes and previously identified resistance-associated loci). A total of  
202 3,059,528bp of the 1302 sequence capture regions was successfully sequenced in 70  
203 individual mosquitoes (Tables S2, S3 and S4). Mapping and coverage metrics of the  
204 targeted sequencing relative to the reference genome were within expectation (Table  
205 S3 and S4). The good quality of the target enrichment is also supported by the average  
206 base quality of the reads, the alignment score of the mapped reads and the match  
207 status of paired ended reads for each sample (Figure S3). Integrative Genomics  
208 Viewer (IGV) [18] was used to visually inspect the alignment results showing that in  
209 general, sequence capture regions were well covered and lower level coverage was  
210 seen between these regions.

211

212 A total of 137,137 polymorphic sites were detected across all three countries plus the  
213 susceptible FANG laboratory colony. The Malawi samples exhibited lower  
214 polymorphisms compared to the reference genome (FUMOZ, originally sampled in  
215 southern Mozambique), which is expected as both are from southern Africa. Analysis  
216 performed between each country and FANG detected 75,980, 79,095 and 38,380  
217 polymorphic sites respectively in Cameroon, Uganda and Malawi. Detection of the  
218 SNPs significantly associated with permethrin resistance was performed firstly using  
219 the differential SNP frequency analysis implemented in Strand NGS (Strand Life  
220 Sciences, Bangalore, India).

221  
222 **Cameroon:** Using the frequency-based filtering approach, 92 SNPs out of the 75,980  
223 polymorphic sites were found to be significant between resistant and susceptible field  
224 mosquitoes (R-C), 73 between resistant and the FANG (R-S), and 64 between  
225 Cameroon susceptible and FANG (Figure 2a). Most of these SNPs were silent  
226 substitutions followed by intronic and non-synonymous ones (Table S5; Figure 2b).  
227 We considered the best candidate SNPs to be those present commonly between the  
228 three comparisons. These common SNPs belong to 16 genes (Figure 2c) including  
229 seven cytochrome P450s in the known major pyrethroid resistance QTLs notably *rp1*  
230 (*CYP6P4a*, *CYP6P9b*) on 2R chromosome, *rp2* (*CYP6M1b*, *CYP6M1c*, *CYP6S2*) on  
231 chromosome 2L, as well as in *rp3* (*CYP9J11*) on chromosome 3L. Further evidence  
232 of the association of polymorphisms at *rp1* with the resistance phenotype was the  
233 presence of the carboxylesterase gene (AFUN015787) located within this same  
234 genomic region. Two cuticle protein genes presented abundant significant SNPs  
235 (AFUN009934 and AFUN009937) for all three comparisons. Looking at the  
236 nonsynonymous substitutions, two genes showed common amino acid changes for all  
237 three comparisons, the P450 *CYP6AK1* (AFUN000518) on the 3L chromosome and  
238 the UDP-glucuronosyl transferase (AFUN004976). Analysis of the 92 SNPs significant  
239 in the R-C (Figure 2a) comparison revealed that the gene with most non-synonymous  
240 substitutions is the immune response gene *APL1C* (four nonsynonymous sites)  
241 followed by the carboxylesterase (AFUN015787) (three nonsynonymous sites) (Table  
242 S5). There were also other immune response genes such as the chymotrypsin-like  
243 elastase and other serine proteases. Such genes were also over-expressed in  
244 resistant *An. funestus* mosquitoes in previous studies [5, 11, 19, 20].  
245

246 **Uganda:** Using the frequency-based filtering approach, 62 SNPs out of the 79,095  
247 polymorphic sites were found to be significant between Ugandan permethrin resistant  
248 and susceptible field mosquitoes (R-C), 85 between resistant and the FANG (R-S) and  
249 92 between Ugandan susceptible and FANG (Figure 2d). Again, as for Cameroon  
250 most of these SNPs were silent substitutions followed by intronic and non-synonymous  
251 SNPs (Figure 2e). The SNPs present in all three comparisons belong to 12 genes  
252 (Figure 2f) including four P450s from the *rp1* QTL (*CYP6P9a* and the pseudo-P450  
253 AFUN008357) and *rp2* (*CYP6M1c* and *CYP6S2*). As for Cameroon, three cuticle  
254 protein genes had the most significant SNPs between the three comparisons. Looking  
255 at the nonsynonymous substitutions, two genes showed common amino acid changes  
256 for all three comparisons, the P450 *CYP6AK1* (AFUN000518) and a cuticle protein  
257 (AFUN009934). Analysis the list of the 62 SNPs significant in the R-C revealed that  
258 the gene with most non-synonymous substitutions was again the immune response  
259 gene *APL1C* (three nonsynonymous sites) followed by the cytochrome P450 *CY4H19*  
260 (AFUN001746) (two nonsynonymous sites) (Table S5). Like Cameroon, there were  
261 also other immune response genes such as the chymotrypsin-like elastase and other  
262 serine proteases.

263  
264 **Malawi:** The frequency-based filtering approach detected 74 significant SNPs out of  
265 the 38,380 polymorphic sites between Malawian permethrin resistant and susceptible  
266 field mosquitoes (R-C) (Table S5), with 521 between resistant and the FANG (R-S)  
267 and 519 between Malawian susceptible and FANG (Table S6; Figure 2g). Malawian  
268 *An. funestus* are similar genetically to those from Mozambique from which the  
269 reference genome FUMOZ was generated, thus, the low diversity seen in this  
270 population in comparison to reference genome. Furthermore, due to this similarity to

271 a highly-resistant reference sequence, significant SNPs have been detected assuming  
272 a higher frequency in the susceptible than the resistant. Among the common SNPs,  
273 the silent substitutions are again predominant followed by non-synonymous and  
274 5'UTR SNPs (Figure 2h). These common SNPs belong to seven genes (Figure 2i)  
275 including three P450s from the *rp1* (*CYP6P4a*) and *rp2* (*CYP6M1b* and *CYP6N2*)  
276 QTLs. The gene with the most significant SNPs is the P450 *CYP6M1b*. Analysis of the  
277 list of the 74 SNPs significant in the R-C revealed that the gene with most non-  
278 synonymous substitutions was the P450 *CYP6AK1* (three nonsynonymous sites)  
279 followed by the cuticle protein (AFUN009936) (two nonsynonymous sites) and  
280 cytochrome P450 *CYP4H19* (AFUN001746) (two nonsynonymous sites) (Table S5).  
281 As in Cameroon and Uganda, SNPs in immune response genes were also found in all  
282 comparisons.

283

284 A second approach consisted in detecting significant SNPs using the t-test in each  
285 country provided the following results.

286

287 **Cameroon:** Comparing the resistant and the susceptible mosquitoes from Cameroon  
288 detected several SNPs with significant allele frequency. However, when considering  
289 the Bonferroni multiple testing correction cut-off, these SNPs were not above the  
290 threshold when all SNPs were included. However, when the most common SNPs only  
291 (present in three or more mosquitoes) were analysed, significant SNPs were detected.  
292 The most highly significant SNP was in the cytochrome P450 *CYP304B1* on the 2R  
293 chromosome ( $P=1.7 \cdot 10^{-5}$ ). Analysis of the 29 SNPs with  $P < 0.001$  revealed seven  
294 SNPs that were also detected with the frequency-based filtering approach above  
295 (Table S7; Figure 3a) including a SNP located in chorion peroxidase (AFUN00618),

296 the cytochrome P450 *CYP6M1c* (AFUN010919) on the *rp2* QTL. Some of these 29  
297 SNPs also belong to genes that were significantly over-expressed in resistant  
298 mosquitoes such the P450 *CYP315A1* and the glutathione S-transferase *GSTe3*.  
299 Three non-synonymous SNPs are detected belonging to the P450 *CYP304B1* (amino  
300 acid change: I504V), the chymotrypsin-like protease (AFUN015111) (D476G) and the  
301 decarboxylase, AFUN007527 (V169L). A comparison of the resistant mosquitoes of  
302 Cameroon to the FANG was performed to detect key regions with highly significant  
303 SNPs, which could be associated with resistance, even though population structure  
304 could explain most of these differences. Therefore, comparing R-S detected, as  
305 expected, very high significance level with top P-value of  $7.8 \times 10^{-48}$  corresponding to  
306 a cuticular protein gene (AFUN004689). Overall, most of the major genomic regions  
307 with the highest significance of SNPs between Cameroon and FANG are found around  
308 the pyrethroid resistant QTL *rp1*, and a region made of Zinc finger protein  
309 (AFUN015873), as well as a cluster of ABC transporter genes around ABCG4 (Table  
310 S8; Figure 3b). This cluster of ABC transporter genes were also detected in the R-C  
311 comparison.

312

313 **Uganda:** When the resistant and the susceptible mosquitoes from Uganda were  
314 compared (R-C) several SNPs with significant differential allele frequency were  
315 detected. As for Cameroon when considering the Bonferroni multiple testing correction  
316 cut-off, these SNPs were not above the threshold when all SNPs were included.  
317 However, when the most common SNPs only were analysed as for Cameroon some  
318 were significant. The most highly significant SNP was in the cytochrome P450  
319 *CYP315A1* (AFUN005715) on the X chromosome ( $P=2.9 \cdot 10^{-6}$ ). Some of these 53  
320 SNPs also belong to genes significantly over-expressed in resistant mosquitoes such

321 the P450 *CYP315A1* (Table S9; Figure 3c). Six non-synonymous SNPs are detected  
322 with some belonging to detoxification genes such as the P450 *CYP6AG1* (K262Q), or  
323 to immune response genes such as the transmembrane protease serine 13  
324 (AFUN003078) (H61Y), serine protease 14 (AFUN000319) (N18H), chymotrypsin-like  
325 elastase (AFUN015884) (T40K) and the C-type lectin AFUN002085 (L63R). A  
326 comparison of the resistant mosquitoes from Uganda to FANG was also performed as  
327 in Cameroon detecting as expected a very high significance level with top P value of  
328  $2.28 \cdot 10^{-50}$  corresponding to an intergenic substitution between the P450 gene  
329 *CYP6P9a* and a carboxylesterase gene (AFUN015793) on the *rp1* QTL region (Table  
330 S10; Figure 3d). Overall, most of the major genomic regions with the highest  
331 significance of SNPs between Uganda and FANG are found around the pyrethroid  
332 resistant QTL *rp1* and a cluster of ABC transporter genes around ABCG4 (Figure 3d).  
333 Interestingly, a peak of significant SNP corresponds to the *CYP9K1* P450 gene shown  
334 to be highly expressed in Uganda and with a marked selective sweep signature around  
335 it from whole genome sequencing [9]. Another region corresponded to the  
336 argininosuccinate lyase gene which is also highly overexpressed in Uganda compared  
337 to FANG.

338

339 **Malawi:** Several SNPs with significant differential allele frequency were detected when  
340 comparing the resistant and susceptible mosquitoes in Malawi although when  
341 considering the Bonferroni multiple testing correction cut-off, some of these SNPs  
342 were not above the threshold when all SNPs were included. Among the 59 significant  
343 SNPs the top significant was a synonymous substitution in the ABC transporter gene  
344 (ABCG4) (A/G, N1347) (AFUN007162) on the X chromosome ( $P=3.0 \cdot 10^{-8}$ ) (Table  
345 S11; Figure 3e). Some of these 59 SNPs also belong to genes significantly over-

346 expressed in resistant mosquitoes such the P450 *CYP6Y1* and the synonymous A/G  
347 substitution in the cuticle protein gene AFUN009937 (V48). Four nonsynonymous  
348 SNPs were detected with some belonging to detoxification genes such as xanthine  
349 dehydrogenase (AFUN002567) (Q799E), or to immune response genes such as the  
350 Toll-like receptor (AFUN002942) (V104M). A comparison of the resistant mosquitoes  
351 from Malawi to FANG was also performed detecting as expected very high significance  
352 level with top P value of  $1.7 \cdot 10^{-45}$  corresponding to a synonymous substitution in the  
353 P450 gene *CYP6P2* in the *rp1* QTL region where a cluster of significant hits is  
354 observed (Table S12; Figure 3f). Another cluster of significant hits is also detected  
355 around the ABCG4 gene which is also significant between the R-C comparisons  
356 (Figure 3f).

357

### 358 **Heterologous expression of *An. funestus* CYP9K1 in *Escherichia coli***

359

360 ***Expression pattern of recombinant CYP9K1:*** A standard P450 carbon monoxide  
361 (CO) -difference spectrum was obtained when *CYP9K1* was co-expressed with  
362 cytochrome p450 reductase (CPR) in *E. coli*, as expected from a good-quality  
363 functional enzyme with a predominant expression at 450 nm and low P420 content  
364 (Figure 4a). Recombinant *CYP9K1* expressed with a P450 concentration of ~1.2 nM  
365 at 48hr, and a P450 content of 0.93 nmol/mg protein. The membranous P450  
366 reductase activity was calculated as 52.04 cytochrome c reduced/min/mg protein.

367 ***An. funestus CYP9K1 metabolism of insecticides:*** Recombinant *CYP9K1*  
368 exhibited contrasting activity towards permethrin (Type I) and deltamethrin (Type II).  
369 While no metabolic activity was observed with permethrin (0.47% depletion), *CYP9K1*  
370 depleted 64% ( $64.37.5\% \pm 3.44$ ,  $p < 0.01$ ) of deltamethrin in 90min [as determined by

371 the disappearance of substrate (20  $\mu$ M) after 90 min] compared to controls (with no  
372 NADPH) (Figure 4b and c). For DDT, a depletion of only 17% was observed, with no  
373 peak for either dicofol (kelthane) or DDE.

374

### 375 **Analysis of *CYP9K1* polymorphism across Africa**

#### 376 **Comparative analysis of *CYP9K1* polymorphism in resistant and susceptible**

377 **mosquitoes:** A 2,707 bp genomic fragment spanning the full *CYP9K1* gene (5'UTR,  
378 3'UTR, two exons and one intron) was analysed between ten permethrin-resistant and  
379 ten susceptible mosquitoes from each of the three countries and from the FANG.

380 Analysis of these 70 mosquitoes revealed 137 substitutions and 72 haplotypes of the  
381 2.7kb gene-body of *CYP9K1* across the continent. When mosquitoes were analysed  
382 by country, however, a stark contrast was observed between Uganda and other  
383 samples. This was evident for most parameters assessed, notably the lower number  
384 of substitution sites in Uganda (35 overall) versus Cameroon (123) and Malawi (42).

385 A similar paucity of haplotypes was observed, with just five haplotypes in Uganda  
386 versus 38 and 29 in Cameroon and Malawi, respectively. Not surprisingly therefore,  
387 haplotype diversity in Uganda was also very low (0.19) in contrast to Cameroon (0.99)

388 and Malawi (0.97) (Table S13). Similar patterns for Uganda were observed for other  
389 parameters including nucleotide diversity ( $\pi$ ), this is well illustrated in the plot of  
390 haplotype diversity and nucleotide diversity (Figure 5b). Furthermore, Uganda

391 samples exhibited low diversity when compared to the FANG and FUMOZ. Both dead  
392 and alive mosquitoes exhibited this low diversity in Uganda (Figure 5a). A similar  
393 pattern of reduced polymorphism was seen when considering only the coding region

394 (1614bp) (Table S14) or the non-coding (introns plus UTRs; 1093bp) (Table S15).

395 Analysis of the coding region detected a non-synonymous polymorphism, substituting



396 glycine for alanine at position 454, a mutation which is present in all individuals from  
397 Uganda. This G454A change was detected at lower frequencies in Malawi (14/40) and  
398 in Cameroon (9/40). An analysis using the Cytochrome P450 Engineering Database  
399 (CYPED) [21] reveals that this G454A mutation is between the meander and cysteine  
400 pocket, which should impact on activity/catalysis, as amino acids in this region  
401 stabilizes the heme structural core and supposed to be involved in interaction with  
402 P450 reductase.

403

404 **Phylogenetic tree:** A maximum likelihood tree of *CYP9K1* sequences supported the  
405 high genetic diversity of this gene across the continent with several haplotypes  
406 clustering, mostly by their geographical origin (Figure 5b). While mosquitoes from  
407 other countries cluster randomly, the majority of those from Uganda belong to a major  
408 predominant haplotype (36 out of 40 sequences).

409

410 ***CYP9K1* Haplotype Network:** Analysis of the Templeton, Crandall and Sing (TCS)  
411 haplotype tree further highlighted the high polymorphism of *CYP9K1* across Africa with  
412 many singleton haplotypes separated by many mutational steps (>30 steps) (Figure  
413 S4a-b). The predominant haplotype 'H1' was nearly fixed in Uganda (32/40) when  
414 considering the full-length or also only the coding region (36/40). The fact that this H1  
415 haplotype is shared by both alive and dead mosquitoes suggest that it is close to  
416 fixation in this population. In other countries most haplotypes are found as singletons  
417 (35 out of 40 in Cameroon; 22 out of 40 in Malawi) supporting the high diversity of  
418 *CYP9K1* in those locations in contrast to Uganda. This pattern is similar when only  
419 analyzing the coding region (Figure S5a-b) or the non-coding (Figure S6a-b).

420

421 **Discussion**

422

423 As malaria prevention still relies heavily on insecticide-based interventions, it is  
424 essential to improve our understanding of the mechanisms driving resistance in  
425 malaria vectors to prolong the effectiveness of these tools by implementing suitable  
426 resistance management strategies. The present study used a multi-omics approach,  
427 and one of these approaches detected that the cytochrome P450 *CYP9K1* is a major  
428 driver of pyrethroid resistance in East African populations of the major malaria vector  
429 *An. funestus*.

430

431 **1-Genome-Wide Association study with the PoolSeq Approach probably needs**  
432 **more replications**

433

434 The replicated PoolSeq-based genome-wide association study did not detect  
435 significant variants associated with resistance. This is contrary to the usefulness of  
436 this method previously in detecting variants associated with natural pigmentation  
437 variation in *Drosophila* [13]. Among possible reasons for the lack of sensitivity of this  
438 is the poor phenotype segregation in our samples from Malawi. Resistance to  
439 insecticide was already relatively high in this population reducing the ability to  
440 differentiate between resistant and susceptible. Additionally, increasing the number of  
441 replicates could have increased power of detection unfortunately the high resistance  
442 level made it difficult to generate sufficient susceptible individuals per location. This  
443 was the case for the *Drosophila* pigmentation experiment where more replicates of  
444 larger pools of flies were analysed [13], not available to us here as stated above.  
445 Despite the low number of candidate hits detected, the elevated region on

446 Chromosome 3 in Malawi does contain six cuticular protein genes (belonging to the  
447 RR-2 family associated with the reduced penetration resistance mechanism [22]. This  
448 could indicate that the reduce penetration resistance mechanism through cuticle  
449 thickening is playing a role in resistance to pyrethroid in Malawi. However, it is  
450 noticeable that no hit was detected on the 2R chromosome region spanning the  
451 resistance to pyrethroid 1 QTL (*rp1*), which was observed between Malawi and  
452 Cameroon. This is likely due to the fixation of selected alleles at these two P450 genes  
453 [4], and highlights a drawback in our binary alive versus dead phenotypes as a proxy  
454 for resistant and susceptible genotypes. This is similar to the case of knockdown  
455 resistance allele L1014F which being fixed in many populations of *An. gambiae* does  
456 not correlate with phenotype when using field samples mainly due to the high selection  
457 in these samples [23, 24]. The validity of the poolstat and Popoolation 2 approaches  
458 was nevertheless confirmed by the southern (Malawi) versus Central Africa  
459 (Cameroon) analysis which detected differentiation at the *rp1* locus. This locus  
460 contains the *CYP6P9a* and *CYP6P9b* cytochrome P450 genes, which confer  
461 pyrethroid-resistance and are under strong directional selection in southern African  
462 populations of *An. funestus* [5, 11, 19]. Although statistically attractive, the replicated  
463 PoolSeq offers us little extra over inter-country comparisons of pooled-sequencing as  
464 demonstrated by detection of the *rp1* locus here and prior work [5, 9]. Perhaps, a  
465 PoolSeq approach using a crossing of resistant strains to susceptible one could  
466 provide a more productive platform to detect genetic variants associated with related  
467 resistance as implemented in *Aedes aegypti* [25].

468

469 **2-Deep targeted sequencing of genomic regions spanning detoxification genes**  
470 **detects genetic variants of interest**

471 A fine-scale approach combining targeted enrichment and deep sequencing  
472 successfully detected variants associated with pyrethroid resistance. This was most  
473 evident when comparing resistant mosquitoes to the fully susceptible laboratory FANG  
474 strain than when alive and dead mosquitoes from the same location were compared.  
475 This low power of detection when comparing samples from the same locality is likely  
476 due to high level of resistance inducing a poor segregation between samples. If the  
477 high number of significant variants detected between resistant and susceptible strain  
478 could be due to a difference in genetic background, the fact that key genomic regions  
479 previously associated with resistance were clearly and consistently detected such as  
480 *rp1*, revealed the ability of this approach to detect resistance mutations. Indeed, the  
481 *rp1* QTL region harbouring a cluster of P450s involved in resistance such as  
482 *CYP6P9a/b*, *CYP6P4a/b*, *CYP6P5* was one of the major loci detected. This could  
483 explain why this region was significantly associated with resistance in all regions since  
484 at least one gene from this region is over-expressed in each region with *CYP6P5* in  
485 Cameroon and Uganda, *CYP6P9a/b* in Malawi [5, 11]. Furthermore, a consistent  
486 resistance locus in all three countries when compared to FANG was associated with  
487 the ABC transporter gene ABCG4 (AFUN016161-RA) located in the vicinity of two  
488 other ABC genes (ABCC4 and ABCC6 as in *An. gambiae*). This highlights the potential  
489 important role played by ABC transporters in the resistance to insecticides in general  
490 as reported recently [26, 27] and particularly in *An. funestus*. Further work is needed  
491 to elucidate the contribution of the gene and variants to the pyrethroid resistance in  
492 this species. In Uganda, a significant resistance locus was detected when comparing  
493 Uganda resistant to FANG corresponded to *CYP9K1*, in line with country-specific  
494 PoolSeq results and RNAseq that show a high over-expression of this gene only in  
495 Uganda [5], further support for the likely key role that this P450 gene plays in the

496 pyrethroid resistance in this country [28]. *CYP9K1* has also been implicated in  
497 pyrethroid resistant in other mosquito species such as *An. parensis* [29] and *An.*  
498 *coluzzii* [30]. This correlation between RNAseq and targeted sequencing for *CYP9K1*  
499 shows that if the phenotypic segregation is wide enough then target enrichment and  
500 sequencing could be sufficiently robust to detect variants associated with resistance.  
501 Nevertheless, despite narrowing the genomic region associated with resistance to the  
502 gene level confirmation of the causative variant requires a further fine scale  
503 sequencing of candidate gene and regulatory regions using a classical Sanger  
504 sequencing approach followed up by functional genomics such as promoter activity  
505 analyses. Without moving to finer scale and functional analyses whole genome studies  
506 do not yield the variants needed to design simple molecular diagnostic for resistance  
507 tracking of metabolic resistance. An approach we have taken for other metabolic  
508 resistance-conferring loci: *GSTe2* [8], *CYP6P9a* [28] and *CYP6P9b* [11].

509

### 510 **3- *An. funestus* CYP9K1 is a metaboliser of type II pyrethroids**

511 The heterologous expression of *An. funestus* CYP9K1 (*AfCYP9K1*) in *E. coli* followed  
512 by metabolism assays revealed that CYP9K1 metabolises the type II pyrethroid,  
513 deltamethrin. Recombinant CYP9K1 had a depletion rate similar to those observed for  
514 other cytochrome P450s genes in *An. funestus* including CYP6P9b [4], CYP6P9a and  
515 CYP6M7 [7], CYP9J11 (CYP9J5) [31] and CYP6AA1 [32] or in other malaria vectors  
516 such as CYP6M2 in *An. gambiae* [33] or CYP6P3 [34]. However, the observed *An.*  
517 *funestus* CYP9K1 depletion rate of deltamethrin was twice that for *An. coluzzii*  
518 CYP9K1 (64% vs 32%), shown to be conferring pyrethroid resistance in the *An.*  
519 *coluzzii* population of Bioko Island [30] after scale-up of both LLINs and IRS [30]. We  
520 hypothesise that the *AfCYP9K1* allele from Uganda may therefore be significantly

521 more catalytically efficient than the *An. coluzzii* allele selected in Bioko Island.  
522 Noticeably, *AfCYP9K1* did not metabolise the type I pyrethroid permethrin, with no  
523 substrate depletion observed after 90min suggesting that *AfCYP9K1* metabolism is  
524 specific to type II pyrethroid. This is similar to previous observations where some  
525 P450s could only metabolise one type of pyrethroids. Notably, the CYP6P4 of the  
526 malaria vector *An. arabiensis* sampled from Chad was shown not to metabolise type  
527 II pyrethroid, deltamethrin, which correlated with susceptibility to this insecticide in this  
528 mosquito population [35]. However, we cannot rule out that *AfCYP9K1* also  
529 contributes to type I resistance either through metabolism of secondary metabolites  
530 generated by other P450s such as CYP6P9a/b or CYP6P5 also shown to be over-  
531 expressed in Uganda [5, 31]. *AfCYP9K1* could also act through other mechanisms  
532 such as sequestration. Considering the very strong selection on this allele established  
533 here and previously [9] further studies are needed to establish the extent, if any, of  
534 the interaction of CYP9K1 with type I pyrethroids. One possibility is trans-regulation of  
535 CYP9K1 as reported for the lepidopteron pest, *Spodoptera exigua* for which trans-  
536 acting transcriptional regulators (CncC/Maf) and a cis-regulatory element (Knirps) are  
537 both interacting with the 5' UTR of the P450 gene *CYP321A8*, leading to its  
538 upregulation of expression [36].

539

#### 540 **4-A directionally selected *CYP9K1* allele is driving resistance in Uganda**

541 *CYP9K1* is under strong directional selection in Uganda as shown by the  
542 polymorphism pattern of this gene in Uganda, with both low numbers of substitutions  
543 (35 vs 123 in Cameroon) and haplotypes (5 vs 38 in Cameroon) identified. Strong  
544 selection on the *CYP9K1* allele in Uganda is likely driven by the scale up of pyrethroid-

545 based interventions, notably the mass distribution of bed nets. Scale up of bed nets  
546 has been strongly associated with the escalation of pyrethroid resistance in southern  
547 African *An. funestus* populations [9, 37, 38].

548 Furthermore, a single haplotype is predominant for *CYP9K1* in Uganda in line with  
549 directional selection. Such positive selection is similar to many other cases of  
550 cytochrome P450 selected in various insect populations. This is also the case for  
551 *CYP6P9a/b* P450s in *An. funestus* for which strongly directionally selected alleles are  
552 now fixed in southern African populations [4, 5, 38]. This is also the case for *CYP9K1*  
553 in *An. coluzzii* in Mali [39] where an allele has been positively selected in populations  
554 post-2006. Similar selective sweeps on P450s have been also reported in *Drosophila*  
555 *melanogaster*, where a single *CYP6G1* allele conferring DDT resistance containing a  
556 partial Accord transposable element in the 5' UTR has spread worldwide [40], [41].  
557 Previous analysis has also shown that the high selection of *CYP9K1* occurs alongside  
558 a high level of over-expression related to duplication of the locus of this gene in  
559 Uganda [9]. Further supporting selection of an allele with enhanced metabolically  
560 efficiency in breaking down pyrethroids. This is supported by the fixation of the amino  
561 acid substitution of glycine for alanine at position 454 (G454A). This position is located  
562 close to the substrate binding pocket, and we hypothesise that increase the affinity  
563 and metabolism of this enzyme for deltamethrin. A similar scenario was seen for *An.*  
564 *funestus* *CYP6P9a/b* for which both *in vivo* and *in vitro* studies revealed that key amino  
565 acid changes (N384S) were able to increase the catalytic efficiency of these enzymes  
566 [42]. Further evidence comes from humans for which amino acid changes in *CYP2D6*,  
567 *CYP2C9*, *CYP2C19* and *CYP2A6* have been shown to affect drug metabolism a low  
568 drug metabolism conferred by some alleles while others confer a fast metabolism rate  
569 [43]. Similarly, other amino acid changes in the glutathione S-transferase *GSTe2*

570 enzyme in *An. funestus* (L119F) [8] and in *An. gambiae* (I114T) [44] were also shown  
571 to drive pyrethroid/DDT resistance in these vectors.

572

## 573 **Conclusion**

574 This study has integrated the combined power of PoolSeq-based GWAS and deep  
575 target sequencing of pyrethroid resistant and susceptible mosquitoes with *in vitro*  
576 functional validation in *E. coli* of identified candidate genes. We demonstrate that a  
577 highly selected *CYP9K1* is driving pyrethroid resistance in Eastern African populations  
578 of the major malaria vector *An. funestus*. This result improves our understanding of  
579 the molecular basis of metabolic resistance to pyrethroid in malaria vectors and will  
580 furthermore facilitate the detection of causative markers to design field applicable  
581 diagnostic tool to detect and track this resistance across Africa.

582

## 583 **Materials and Methods**

584

### 585 **1. Design of SureSelect baits**

586

587 The sequence capture array was designed prior to the release of the *An. funestus*  
588 genome assembly, using a mix of *de novo* assembled *An. funestus* transcripts [45, 46]  
589 selected from previous pyrethroid resistance microarray experiments [4, 7]. Among  
590 these were heat shock proteins (HSPs), Odorant Binding Proteins and immune  
591 response genes such as serine peptidases, *Anopheles gambiae* detoxification genes  
592 sequences (282 genes) and all target-site resistance genes sequences from *An.*  
593 *funestus*. We also included the entire genomic regions of the major quantitative trait  
594 locus (QTLs) associated with pyrethroid resistance which are the 120kb BAC clone of



595 the *rp1* containing the major *CYP6* P450 cluster on the 2R chromosome arm, as well  
596 as the 113kb BAC clone sequence for the *rp2* on the 2L chromosome arm. A total of  
597 1,302 target sequences were included (with redundancy). Baits were designed using  
598 the SureSelect DNA Advanced Design Wizard in the eArray program of Agilent. The  
599 bait size was 120bp for paired-end sequencing using the “centered” option with a bait  
600 tiling frequency (indicating the amount of bait overlap) of “x3”.

601

## 602 **2. Collection, rearing and sequencing of mosquitoes**

603 Two *An. funestus* laboratory colonies (the FANG and FUMOZ) and field mosquitoes  
604 from Cameroon, Malawi and Uganda were utilised in this study. The FANG colony is  
605 a fully insecticide susceptible colony derived from Angola [47]. The FUMOZ colony is  
606 a multi-insecticide resistant colony derived from southern Mozambique [47]. Field  
607 populations of mosquitoes representative of Central, East and southern Africa were  
608 sampled from Mibellon (6°46' N, 11°70' E), Cameroon in February 2015; in March  
609 2014 from Tororo (0°45' N, 34°5' E), Uganda [48] and in January 2014 from Chikwawa  
610 (16°1' S, 34°47' E), southern Malawi [49]. Mosquitoes were kept until fully gravid and  
611 forced to lay eggs using the forced-egg laying method [50]. All F<sub>0</sub> females/parents that  
612 laid eggs were morphologically identified as belonging to the *An. funestus* group  
613 according to a morphological key [51]. Egg batches were transported to the Liverpool  
614 School of Tropical Medicine under a DEFRA license (PATH/125/2012). Eggs were  
615 allowed to hatch in cups and mosquitoes reared to adulthood in the insectaries under  
616 conditions described previously [50]. Insecticide resistance bioassays on these  
617 samples have been previously described [48, 49, 52]. In summary, two-to-five-day old  
618 F<sub>1</sub> females were exposed to permethrin for differing lengths of time to define a set of  
619 putatively susceptible (dead after 60 min permethrin exposure for Malawi and Uganda

620 populations, and 20 min for Cameroon) and resistant (alive after 180 min permethrin  
621 exposure; 60 min in Cameroon) mosquitoes. The variation of exposure time was  
622 associated with the level of resistance in the population.

623  
624 For the PoolSeq experiment, there were sufficient individuals for two ‘susceptible’ and  
625 three ‘resistant’ replicates for 40 individuals each from Malawi and one “susceptible”  
626 and one “resistant” replicate from Cameroon. Genomic DNA was extracted per  
627 individual using the DNeasy Blood and Tissue kit (Qiagen, Hilden, Germany) and  
628 individuals pooled per replicate in equal amounts. Library preparation and whole-  
629 genome sequencing by Illumina HiSeq2500 (2x150bp paired-end) was carried out by  
630 Centre for Genomic Research (CGR), University of Liverpool, United Kingdom. The  
631 SureSelect experiment consisted of ten permethrin susceptible and ten resistant  
632 mosquitoes from Malawi (Southern), Cameroon (Central) and Uganda (Eastern) Africa  
633 from the set used for the PoolSeq, above. An additional ten mosquitoes from the  
634 susceptible FANG strain were also included. The library construction and capture were  
635 performed by the CGR using the SureSelect target enrichment custom kit with the  
636 41,082 probes. Libraries were pooled in equimolar amounts and paired-end  
637 sequenced (2x150bp) with 20 samples per run of an Illumina MiSeq by CGR, using v4  
638 chemistry.

639

### 640 **3. Population genomic pipelines**

641

#### 642 **3.1. Analysis of PoolSeq data**

643 The PoolSeq data was analysed in the R package poolstat [16] and Popoolation2 [17]  
644 in order to cross-validate inferences. Both approaches were designed specifically for

645 pooled sequencing datasets. For poolstat, PoolSeq R1/R2 read pairs were aligned to  
646 the VectorBase version 52 *An. funestus* reference sequence using bwa [53]. Output  
647 BAM alignment files were co-ordinate sorted and duplicates marked in Picard  
648 (<http://broadinstitute.github.io/picard>). Variant calling was carried out using Varscan  
649 (2.4.4)[54], with a minimum variant frequency of 0.01 and p-value of 0.05 and default  
650 parameters for other options. Variants were filtered in bcftools (1.9)[55] to remove  
651 SNPs within 3 bp of an indel and retain only SNPs for  $F_{st}$ -based analyses.  $F_{st}$  statistics  
652 were then calculated from the VCF file with poolstat. For pairwise intra-Malawi and  
653 Cameroon resistant versus susceptible average  $F_{st}$  was calculated pairwise between  
654 replicates and summarised into non-overlapping 1000 bp windows using  
655 'windowscanr' (<https://github.com/tavareshugo/WindowScanR/>). For all replicates  
656 combined analyses of Malawi and Cameroon versus Malawi analyses average  $F_{st}$  of  
657 non-overlapping sliding windows of 1000 SNPs were calculated within poolstat.  
658 For Popoolation 2 analyses, a sync file was created from a samtools mpileup (v1.12)  
659 and separate comparisons of "Dead versus Alive" and "Cameroon versus Malawi"  
660 input to the Cochran-Mantel-Haenszel (CMH) test script "CMH-test.pl". Only sites with  
661 total coverage greater less than 10x and less than the 95<sup>th</sup> centile for each sample  
662 were considered. This test uses multiple independent pairwise comparisons to identify  
663 the signals common to all. In this case, the data do not conform to the usual use-case  
664 for the CMH test, in which multiple 2x2 contingency tables are stratified by, for  
665 instance, location or experiment. Here, independent exposure assays were used to  
666 generate the dead and the alive mosquitoes, therefore any pair of samples used to  
667 generate a 2x2 contingency table is arbitrary. Using all six possible pairwise  
668 combinations of the two Dead and three Alive samples means that the 2x2 tables are  
669 not independent of one another and violates the assumptions of the test. This test was

670 run, however, to compare the results to those from tests using independent  
671 comparisons. These were six runs of the test made each with two different,  
672 independent pairwise combinations of dead and alive samples. Genome-wide  $F_{st}$  and  
673  $-\log_{10}$  p-value plots were created in R using ggplot2 [56] for poolfstat and Popoolation  
674 results, respectively.

675

### 676 **3.2. Analysis of SureSelect data**

677 Initial processing and quality assessment of the sequenced data was performed  
678 as for the PoolSeq data and analysed using StrandNGS 3.4 (Strand Life Sciences,  
679 Bangalore, India). Alignment and mapping were performed using the “DNA alignment”  
680 option against the whole genome (version AfunF1) which was constructed into three  
681 chromosomes using synteny from *An. gambiae* [5, 9]. Aligned and mapped reads were  
682 used to create a DNA variant analysis experiment. Before variant detection, a SNP  
683 pre-processing was performed to reduce false positive calls: (i) split read re-alignment  
684 of partially aligned split reads and noisy normally aligned reads; (ii) local realignment  
685 to reduce alignment artefacts around indels; and (iii) base quality score recalibration  
686 to reduce errors and systematic bias.

687 All variant types [SNPs, MNPs (multiple nucleotide polymorphisms) and indels] were  
688 detected by comparing against the FUMOZ genome using the MAQ independent  
689 model implemented in StrandNGS 3.4 and default parameters. A SNP multi sample  
690 report was generated for each sample. For each variant, its effect was predicted using  
691 the transcript annotation (version AfunF1.4). To identify SNPs significantly associated  
692 with permethrin resistance, two approaches were used. Firstly, we used a differential  
693 allele frequency-based approach where a variant was significant in relation to  
694 permethrin resistance if the supporting read range of the SNP was 35-100% in alive

695 mosquitoes (R) after permethrin exposure and 1-35% in dead mosquitoes (C) (R-C  
696 comparison). Both sets of mosquitoes were also compared to the fully susceptible  
697 laboratory colony, FANG (S), with significant SNPs having frequency >35% but <35%  
698 in FANG (S) in R-S and C-S comparisons. A cut-off of supporting samples range of 5  
699 out of 10 was applied to select the SNPs. The second approach assessed the significant  
700 association between each variant and permethrin resistance by estimating the  
701 unpaired t-test unpaired of each variant between each comparison (R-C, R-S and C-  
702 S) and a Manhattan plot of  $-\text{Log}_{10}$  of P-value created. A SNP frequency cut-off of three  
703 or more samples was applied for this approach.

704

705 Finally, the polymorphism pattern of the *CYP9K1* gene was analysed across Africa  
706 using the SureSelect data. *CYP9K1* polymorphisms were retrieved from the SNP  
707 Multi-sample report file generated through Strand NGS 3.4 for each population.  
708 Bioedit [57] was used to input various polymorphisms in the VectorBase reference  
709 sequence using ambiguous letter to indicate heterozygote positions. Haplotype  
710 reconstruction and polymorphism analyses were made using DnaSPv5.10 [58].  
711 MEGA X [59] was used to construct the maximum likelihood phylogenetic tree for  
712 *CYP9K1*.

713

#### 714 **4. Heterologous expression of recombinant CYP9K1 and metabolic assays**

715

##### 716 **4.1. Amplification and cloning of full-length cDNA of *An. funestus* CYP9K1**

717 RNA was extracted using the PicoPure RNA isolation Kit (Arcturus, Applied  
718 Biosystems, USA) from three pools each of ten permethrin-resistant females from

719 Tororo in Uganda. The RNA was used to synthesize cDNA using SuperScript III  
720 (Invitrogen, USA) with oligo-dT20 and RNase H (New England Biolabs, USA). Full  
721 length coding sequences of *CYP9K1* were amplified separately from cDNA of 10  
722 mosquitoes using the Phusion HotStart II Polymerase (Thermo Fisher, UK) (primers  
723 sequences: Table S16). The PCR mixes comprised of 5X Phusion HF Buffer  
724 (containing 1.5mM MgCl<sub>2</sub>), 85.7μM dNTP mixes, 0.34μM each of forward and reverse  
725 primers, 0.015U of Phusion HotStart II DNA Polymerase (Fermentas, Massachusetts,  
726 USA) and 10.71μl of dH<sub>2</sub>O, 1μl cDNA to a total volume of 14 μl. Amplification was  
727 carried out using the following conditions: one cycle at 98°C for 1min; 35 cycles each  
728 of 98°C for 20s (denaturation), 60°C for 30s (annealing), and extension at 72°C for  
729 2min; and one cycle at 72°C for 5min (final elongation). PCR products were cleaned  
730 individually with QIAquick® PCR Purification Kit (QIAGEN, Hilden, Germany) and  
731 cloned into pJET1.2/blunt cloning vector using the CloneJET PCR Cloning Kit  
732 (Fermentas). These were used to transform cloned *E. coli DH5α*, plasmids  
733 miniprepmed with the QIAprep® Spin Miniprep Kit (QIAGEN) and sequenced on both  
734 strands using the pJET1.2F and R primers provided in the cloning kit.

735

#### 736 **4.2. Cloning and heterologous expression of *An. funestus* CYP9K1 in *E. coli***

737 The pJET1.2 plasmid bearing the full-length coding sequence of *CYP9K1* was used  
738 to prepare the P450 for expression by fusing it to a bacterial *ompA*+2 leader sequence  
739 allowing translocation to the membrane following previously established protocols [35,  
740 60]. This fusion was achieved in a PCR reaction using the primers given in Table S16.  
741 Details of these PCRs are provided in previous publications [7, 35]. The PCR product  
742 was cleaned, digested with *Nde*I and *Xba*I restriction enzymes and ligated into the  
743 expression vector pCWori+ already linearized with the same restriction enzymes to

744 produce the expression plasmid, pB13::*ompA*+2-*CYP9K1*. This plasmid was co-  
745 transformed together with *An. gambiae* cytochrome P450 reductase (in a pACYC-  
746 AgCPR) into *E. coli JM109*. Membrane expression and preparation was performed as  
747 for [61]. Recombinant *CYP9K1* was expressed at 21°C and 150 rpm, 48 hours after  
748 induction with 1mM IPTG and 0.5mM  $\delta$ -ALA to the final concentrations. Membrane  
749 content of the P450 and P450 reductase activity were determined as previously  
750 established [62, 63].

751

### 752 **4.3. *in vitro* metabolism assays with insecticides**

753 Metabolism assays were conducted with permethrin (a Type I pyrethroid  
754 insecticide), deltamethrin (a Type II) and the organochlorine DDT. Assay protocols  
755 have been described previously [7, 32]. 0.2M Tris-HCl and NADPH-regeneration  
756 components were added to the bottom of chilled 1.5ml tubes. Membranes containing  
757 recombinant *CYP9K1* and AgCPR were added to the side of the tube to which  
758 cytochrome  $b_5$  was already added in a ratio 1:4 to the concentration of the *CYP9K1*  
759 membrane. These were pre-incubated for 5min at 30°C, with shaking at 1,200 rpm.  
760 20 $\mu$ M of test insecticide was added into the final volume of 0.2ml (~2.5% v/v  
761 methanol), and reaction started by vortexing at 1,200 rpm and 30°C for 90min.  
762 Reactions were quenched with 0.1ml ice-cold methanol and incubated for 5min to  
763 precipitate protein. Tubes were centrifuged at 16,000 rpm and 4°C for 15min, and  
764 100 $\mu$ l of supernatant and transferred into HPLC vials for analysis. All reactions were  
765 carried out in triplicate with experimental samples (+NADPH) and negative controls (-  
766 NADPH). Per sample volumes of 100 $\mu$ l were loaded onto isocratic mobile phase  
767 (90:10 v/v methanol to water) with a flow rate of 1ml/min, a wavelength of 226nm and  
768 peaks separated with a 250mm C18 column (Acclaim™ 120, Dionex) on an Agilent

769 1260 Infinity at 23°C. For DDT, a solubilizing agent sodium cholate (1mM) was added  
770 as described in [64] and absorption monitored at 232nm. Enzyme activity was  
771 calculated as percentage depletion (difference in the amount of insecticide remaining  
772 in the +NADPH tubes compared with the –NADPH) and a t-test used to assess  
773 significance.

774

### 775 **Availability of data and materials**

776 All genomic datasets are available from the European Nucleotide Archive. Pooled  
777 template whole genome sequencing data are available under study accessions  
778 PRJEB24379 (Cameroon and Malawi PoolSeq), PRJEB24520 (Cameroon  
779 SureSelect), PRJEB47287 (Malawi and Uganda SureSelect [Release date 1<sup>st</sup>  
780 December 2021]) and PRJEB24506 (FANG SureSelect).

781

### 782 **Competing interests**

783 The authors declare that they have no competing interests.

784

### 785 **Funding**

786 This work was supported by a Wellcome Trust Senior Research Fellowships in  
787 Biomedical Sciences to Charles S. Wondji (101893/Z/13/Z and 217188/Z/19/Z) and a  
788 Bill and Melinda Gates Foundation grant to CSW (INV-006003).

789

### 790 **Authors' contributions**

791 CSW conceived and designed the study, JRM and CSW collected the mosquito field  
792 samples. HI, JMR and GDW prepared all samples for genomic sequencing. GDW,  
793 CSW and JH analysed pooled-template genomic data. CSW designed the SureSelect



794 baits and analyse the sequencing data. SSI performed the *CYP9K1* metabolism assay  
795 and sequence characterisation of *CYP9K1*; LJM, BFT and CDT analysed the *CYP9K1*  
796 polymorphism; JH and CSW wrote the manuscript. All authors read and approved the  
797 final manuscript.

798

## 799 **Acknowledgements**

800 Pooled-template whole genome sequencing and SureSelect Target enrichment  
801 libraries were made and sequenced by the Centre for Genomic Research, University  
802 of Liverpool.

803

## 804 References

805

806

807 1. Bhatt S, Weiss DJ, Cameron E, Bisanzio D, Mappin B, Dalrymple U, et al. The effect of  
808 malaria control on *Plasmodium falciparum* in Africa between 2000 and 2015. *Nature*.

809 2015;526(7572):207-11. doi: 10.1038/nature15535. PubMed PMID: 26375008.

810 2. Hemingway J. The way forward for vector control. *Science*. 2017;358(6366):998-9.

811 doi: 10.1126/science.aaj1644. PubMed PMID: 29170222.

812 3. Amenya DA, Naguran R, Lo TC, Ranson H, Spellings BL, Wood OR, et al. Over  
813 expression of a cytochrome P450 (CYP6P9) in a major African malaria vector, *Anopheles*  
814 *funestus*, resistant to pyrethroids. *Insect Mol Biol*. 2008;17(1):19-25. Epub 2008/02/02. doi:

815 IMB776 [pii]

816 10.1111/j.1365-2583.2008.00776.x. PubMed PMID: 18237281.

817 4. Riveron JM, Irving H, Ndula M, Barnes KG, Ibrahim SS, Paine MJ, et al. Directionally  
818 selected cytochrome P450 alleles are driving the spread of pyrethroid resistance in the  
819 major malaria vector *Anopheles funestus*. *Proc Natl Acad Sci U S A*. 2013;110(1):252-7. doi:

820 10.1073/pnas.1216705110. PubMed PMID: 23248325; PubMed Central PMCID:

821 PMCPMC3538203.

822 5. Weedall GD, Mugenzi LMJ, Menze BD, Tchouakui M, Ibrahim SS, Amvongo-Adjia N,  
823 et al. A cytochrome P450 allele confers pyrethroid resistance on a major African malaria  
824 vector, reducing insecticide-treated bednet efficacy. *Sci Transl Med*. 2019;11(484). Epub  
825 2019/03/22. doi: 10.1126/scitranslmed.aat7386. PubMed PMID: 30894503.

826 6. Barnes KG, Irving H, Chiumia M, Mzilahowa T, Coleman M, Hemingway J, et al.  
827 Restriction to gene flow is associated with changes in the molecular basis of pyrethroid  
828 resistance in the malaria vector *Anopheles funestus*. *Proc Natl Acad Sci U S A*.

829 2017;114(2):286-91. doi: 10.1073/pnas.1615458114. PubMed PMID: 28003461; PubMed

830 Central PMCID: PMCPMC5240677.

831 7. Riveron JM, Ibrahim SS, Chanda E, Mzilahowa T, Cuamba N, Irving H, et al. The highly  
832 polymorphic CYP6M7 cytochrome P450 gene partners with the directionally selected  
833 CYP6P9a and CYP6P9b genes to expand the pyrethroid resistance front in the malaria vector  
834 *Anopheles funestus* in Africa. *BMC Genomics*. 2014;15(1):817. doi: 10.1186/1471-2164-15-  
835 817. PubMed PMID: 25261072.

836 8. Riveron JM, Yunta C, Ibrahim SS, Djouaka R, Irving H, Menze BD, et al. A single  
837 mutation in the *GSTe2* gene allows tracking of metabolically-based insecticide resistance in  
838 a major malaria vector. *Genome Biol*. 2014;15(2):R27. doi: 10.1186/gb-2014-15-2-r27.

839 PubMed PMID: 24565444.

840 9. Weedall GD, Riveron JM, Hearn J, Irving H, Kamdem C, Fouet C, et al. An Africa-wide  
841 genomic evolution of insecticide resistance in the malaria vector *Anopheles funestus*  
842 involves selective sweeps, copy number variations, gene conversion and transposons. *PLoS*  
843 *Genet*. 2020;16(6):e1008822. Epub 2020/06/05. doi: 10.1371/journal.pgen.1008822.

844 PubMed PMID: 32497040; PubMed Central PMCID: PMCPMC7297382.

845 10. Djuicy DD, Hearn J, Tchouakui M, Wondji MJ, Irving H, Okumu FO, et al. CYP6P9-  
846 Driven Signatures of Selective Sweep of Metabolic Resistance to Pyrethroids in the Malaria  
847 Vector *Anopheles funestus* Reveal Contemporary Barriers to Gene Flow. *Genes (Basel)*.

848 2020;11(11). Epub 2020/11/11. doi: 10.3390/genes11111314. PubMed PMID: 33167550;

849 PubMed Central PMCID: PMCPMC7694540.

- 850 11. Mugenzi LMJ, Menze BD, Tchouakui M, Wondji MJ, Irving H, Tchoupo M, et al. Cis-  
851 regulatory CYP6P9b P450 variants associated with loss of insecticide-treated bed net  
852 efficacy against *Anopheles funestus*. *Nat Commun*. 2019;10(1):4652. doi: 10.1038/s41467-  
853 019-12686-5. PubMed PMID: 31604938.
- 854 12. Ingham VA, Wagstaff S, Ranson H. Transcriptomic meta-signatures identified in  
855 *Anopheles gambiae* populations reveal previously undetected insecticide resistance  
856 mechanisms. *Nat Commun*. 2018;9(1):5282. Epub 2018/12/13. doi: 10.1038/s41467-018-  
857 07615-x. PubMed PMID: 30538253; PubMed Central PMCID: PMC6290077.
- 858 13. Bastide H, Betancourt A, Nolte V, Tobler R, Stobe P, Futschik A, et al. A genome-wide,  
859 fine-scale map of natural pigmentation variation in *Drosophila melanogaster*. *PLoS Genet*.  
860 2013;9(6):e1003534. doi: 10.1371/journal.pgen.1003534. PubMed PMID: 23754958;  
861 PubMed Central PMCID: PMC3674992.
- 862 14. Faucon F, Dusfour I, Gaude T, Navratil V, Boyer F, Chandre F, et al. Identifying  
863 genomic changes associated with insecticide resistance in the dengue mosquito *Aedes*  
864 *aegypti* by deep targeted sequencing. *Genome Res*. 2015;25(9):1347-59. doi:  
865 10.1101/gr.189225.115. PubMed PMID: 26206155; PubMed Central PMCID:  
866 PMC64561493.
- 867 15. Ghurye J, Koren S, Small ST, Redmond S, Howell P, Phillippy AM, et al. A  
868 chromosome-scale assembly of the major African malaria vector *Anopheles funestus*.  
869 *BioRxiv*. 2019;Preprint.
- 870 16. Gautier M, Vitalis R, Flori L, Estoup A. F-statistics estimation and admixture graph  
871 construction with Pool-Seq or allele count data using the R package poolstat. *bioRxiv*.  
872 2021:2021.05.28.445945. doi: 10.1101/2021.05.28.445945.
- 873 17. Kofler R, Pandey RV, Schlotterer C. PoPoolation2: identifying differentiation between  
874 populations using sequencing of pooled DNA samples (Pool-Seq). *Bioinformatics*.  
875 2011;27(24):3435-6. doi: 10.1093/bioinformatics/btr589. PubMed PMID: 22025480;  
876 PubMed Central PMCID: PMC3232374.
- 877 18. Thorvaldsdottir H, Robinson JT, Mesirov JP. Integrative Genomics Viewer (IGV): high-  
878 performance genomics data visualization and exploration. *Brief Bioinform*. 2013;14(2):178-  
879 92. doi: 10.1093/bib/bbs017. PubMed PMID: 22517427; PubMed Central PMCID:  
880 PMC3603213.
- 881 19. Mugenzi LMJ, Menze BD, Tchouakui M, Wondji MJ, Irving H, Tchoupo M, et al. A 6.5-  
882 kb intergenic structural variation enhances P450-mediated resistance to pyrethroids in  
883 malaria vectors lowering bed net efficacy. *Mol Ecol*. 2020;29(22):4395-411. Epub  
884 2020/09/26. doi: 10.1111/mec.15645. PubMed PMID: 32974960.
- 885 20. Kouamo MFM, Ibrahim SS, Hearn J, Riveron JM, Kusimo M, Tchouakui M, et al.  
886 Genome-Wide Transcriptional Analysis and Functional Validation Linked a Cluster of Epsilon  
887 Glutathione S-Transferases with Insecticide Resistance in the Major Malaria Vector  
888 *Anopheles funestus* across Africa. *Genes (Basel)*. 2021;12:561. doi: <https://doi.org/10.3390/>.
- 889 21. Fischer M, Knoll M, Sirim D, Wagner F, Funke S, Pleiss J. The Cytochrome P450  
890 Engineering Database: a navigation and prediction tool for the cytochrome P450 protein  
891 family. *Bioinformatics*. 2007;23(15):2015-7. Epub 2007/05/19. doi:  
892 10.1093/bioinformatics/btm268. PubMed PMID: 17510166.
- 893 22. Balabanidou V, Grigoraki L, Vontas J. Insect cuticle: a critical determinant of  
894 insecticide resistance. *Curr Opin Insect Sci*. 2018;27:68-74. Epub 2018/07/22. doi:  
895 10.1016/j.cois.2018.03.001. PubMed PMID: 30025637.

- 896 23. Antonio-Nkondjio C, Tene Fossog B, Kopya E, Poumachu Y, Menze Djantio B, Ndo C,  
897 et al. Rapid evolution of pyrethroid resistance prevalence in *Anopheles gambiae* populations  
898 from the cities of Douala and Yaounde (Cameroon). *Malar J*. 2015;14:155. doi:  
899 10.1186/s12936-015-0675-6. PubMed PMID: 25879950; PubMed Central PMCID:  
900 PMC4403825.
- 901 24. Kwiatkowska RM, Platt N, Poupardin R, Irving H, Dabire RK, Mitchell S, et al.  
902 Dissecting the mechanisms responsible for the multiple insecticide resistance phenotype in  
903 *Anopheles gambiae* s.s., M form, from Vallee du Kou, Burkina Faso. *Gene*. 2013;519(1):98-  
904 106. Epub 2013/02/06. doi: 10.1016/j.gene.2013.01.036. PubMed PMID: 23380570;  
905 PubMed Central PMCID: PMC3611593.
- 906 25. Cattel J, Faucon F, Le Peron B, Sherpa S, Monchal M, Grillet L, et al. Combining  
907 genetic crosses and pool targeted DNA-seq for untangling genomic variations associated  
908 with resistance to multiple insecticides in the mosquito *Aedes aegypti*. *Evol Appl*.  
909 2020;13(2):303-17. Epub 2020/01/30. doi: 10.1111/eva.12867. PubMed PMID: 31993078;  
910 PubMed Central PMCID: PMC6976963.
- 911 26. Dermauw W, Van Leeuwen T. The ABC gene family in arthropods: comparative  
912 genomics and role in insecticide transport and resistance. *Insect Biochem Mol Biol*.  
913 2014;45:89-110. doi: 10.1016/j.ibmb.2013.11.001. PubMed PMID: 24291285.
- 914 27. Pignatelli P, Ingham VA, Balabanidou V, Vontas J, Lycett G, Ranson H. The *Anopheles*  
915 *gambiae* ATP-binding cassette transporter family: phylogenetic analysis and tissue  
916 localization provide clues on function and role in insecticide resistance. *Insect Mol Biol*.  
917 2018;27(1):110-22. doi: 10.1111/imb.12351. PubMed PMID: 29068552.
- 918 28. Weedall GM, Mugenzi LMJ, Menze BD, Tchouakui M, Ibrahim SS, Amvongo-Adjia N,  
919 et al. A single cytochrome P450 allele conferring pyrethroid resistance in a major African  
920 malaria vector is reducing bednet efficacy. *Science Translational Medicine*. In Press.
- 921 29. Mulamba C, Irving H, Riveron JM, Mukwaya LG, Birungi J, Wondji CS. Contrasting  
922 *Plasmodium* infection rates and insecticide susceptibility profiles between the sympatric  
923 sibling species *Anopheles parensis* and *Anopheles funestus* s.s: a potential challenge for  
924 malaria vector control in Uganda. *Parasit Vectors*. 2014;7:71. doi: 10.1186/1756-3305-7-71.  
925 PubMed PMID: 24533773; PubMed Central PMCID: PMC3937429.
- 926 30. Vontas J, Grigoraki L, Morgan J, Tsakireli D, Fouseini G, Segura L, et al. Rapid selection  
927 of a pyrethroid metabolic enzyme CYP9K1 by operational malaria control activities. *Proc*  
928 *Natl Acad Sci U S A*. 2018;115(18):4619-24. doi: 10.1073/pnas.1719663115. PubMed PMID:  
929 29674455; PubMed Central PMCID: PMC5939083.
- 930 31. Riveron JM, Ibrahim SS, Mulamba C, Djouaka R, Irving H, Wondji MJ, et al. Genome-  
931 Wide Transcription and Functional Analyses Reveal Heterogeneous Molecular Mechanisms  
932 Driving Pyrethroids Resistance in the Major Malaria Vector *Anopheles funestus* Across  
933 Africa. *G3 (Bethesda)*. 2017;7(6):1819-32. doi: 10.1534/g3.117.040147. PubMed PMID:  
934 28428243; PubMed Central PMCID: PMC5473761.
- 935 32. Ibrahim SS, Amvongo-Adjia N, Wondji MJ, Irving H, Riveron JM, Wondji CS.  
936 Pyrethroid Resistance in the Major Malaria Vector *Anopheles funestus* is Exacerbated by  
937 Overexpression and Overactivity of the P450 CYP6AA1 Across Africa. *Genes (Basel)*.  
938 2018;9(3). doi: 10.3390/genes9030140. PubMed PMID: 29498712; PubMed Central PMCID:  
939 PMC5867861.
- 940 33. Stevenson BJ, Bibby J, Pignatelli P, Muangnoicharoen S, O'Neill PM, Lian LY, et al.  
941 Cytochrome P450 6M2 from the malaria vector *Anopheles gambiae* metabolizes  
942 pyrethroids: Sequential metabolism of deltamethrin revealed. *Insect Biochem Mol Biol*.

- 943 2011;41(7):492-502. Epub 2011/02/18. doi: 10.1016/j.ibmb.2011.02.003. PubMed PMID:  
944 21324359.
- 945 34. Muller P, Warr E, Stevenson BJ, Pignatelli PM, Morgan JC, Steven A, et al. Field-  
946 caught permethrin-resistant *Anopheles gambiae* overexpress CYP6P3, a P450 that  
947 metabolises pyrethroids. *PLoS Genet.* 2008;4(11):e1000286. Epub 2008/12/02. doi:  
948 10.1371/journal.pgen.1000286. PubMed PMID: 19043575.
- 949 35. Ibrahim SS, Riveron JM, Stott R, Irving H, Wondji CS. The cytochrome P450 CYP6P4 is  
950 responsible for the high pyrethroid resistance in knockdown resistance-free *Anopheles*  
951 *arabiensis*. *Insect Biochem Mol Biol.* 2016;68:23-32. doi: 10.1016/j.ibmb.2015.10.015.  
952 PubMed PMID: 26548743; PubMed Central PMCID: PMC4717123.
- 953 36. Hu B, Huang H, Hu S, Ren M, Wei Q, Tian X, et al. Changes in both trans- and cis-  
954 regulatory elements mediate insecticide resistance in a lepidopteron pest, *Spodoptera*  
955 *exigua*. *PLoS Genet.* 2021;17(3):e1009403. Epub 2021/03/11. doi:  
956 10.1371/journal.pgen.1009403. PubMed PMID: 33690635; PubMed Central PMCID:  
957 PMC47978377.
- 958 37. Barnes KG, Weedall GD, Ndula M, Irving H, Mzihalowa T, Hemingway J, et al.  
959 Genomic Footprints of Selective Sweeps from Metabolic Resistance to Pyrethroids in African  
960 Malaria Vectors Are Driven by Scale up of Insecticide-Based Vector Control. *PLoS Genet.*  
961 2017;13(2):e1006539. doi: 10.1371/journal.pgen.1006539. PubMed PMID: 28151952;  
962 PubMed Central PMCID: PMC5289422.
- 963 38. Riveron JM, Huijben S, Tchappa W, Tchouakui M, Wondji MJ, Tchoupo M, et al.  
964 Escalation of Pyrethroid Resistance in the Malaria Vector *Anopheles funestus* Induces a Loss  
965 of Efficacy of Piperonyl Butoxide-Based Insecticide-Treated Nets in Mozambique. *The*  
966 *Journal of infectious diseases.* 2019;220(3):467-75. Epub 2019/03/30. doi:  
967 10.1093/infdis/jiz139. PubMed PMID: 30923819; PubMed Central PMCID:  
968 PMC6603977.
- 969 39. Main BJ, Lee Y, Collier TC, Norris LC, Brisco K, Fofana A, et al. Complex genome  
970 evolution in *Anopheles coluzzii* associated with increased insecticide usage in Mali. *Mol Ecol.*  
971 2015;24(20):5145-57. Epub 2015/09/12. doi: 10.1111/mec.13382. PubMed PMID:  
972 26359110; PubMed Central PMCID: PMC4615556.
- 973 40. Schlenke TA, Begun DJ. Strong selective sweep associated with a transposon  
974 insertion in *Drosophila simulans*. *Proc Natl Acad Sci U S A.* 2004;101(6):1626-31. Epub  
975 2004/01/28. doi: 10.1073/pnas.0303793101  
976 0303793101 [pii]. PubMed PMID: 14745026; PubMed Central PMCID: PMC341797.
- 977 41. Daborn PJ, Yen JL, Bogwitz MR, Le Goff G, Feil E, Jeffers S, et al. A single p450 allele  
978 associated with insecticide resistance in *Drosophila*. *Science.* 2002;297(5590):2253-6.  
979 PubMed PMID: 12351787.
- 980 42. Ibrahim SS, Riveron JM, Bibby J, Irving H, Yunta C, Paine MJ, et al. Allelic Variation of  
981 Cytochrome P450s Drives Resistance to Bednet Insecticides in a Major Malaria Vector. *PLoS*  
982 *Genet.* 2015;11(10):e1005618. doi: 10.1371/journal.pgen.1005618. PubMed PMID:  
983 26517127; PubMed Central PMCID: PMC4627800.
- 984 43. Ingelman-Sundberg M, Sim SC, Gomez A, Rodriguez-Antona C. Influence of  
985 cytochrome P450 polymorphisms on drug therapies: pharmacogenetic, pharmacoepigenetic  
986 and clinical aspects. *Pharmacology & therapeutics.* 2007;116(3):496-526. Epub 2007/11/16.  
987 doi: 10.1016/j.pharmthera.2007.09.004. PubMed PMID: 18001838.
- 988 44. Mitchell SN, Rigden DJ, Dowd AJ, Lu F, Wilding CS, Weetman D, et al. Metabolic and  
989 target-site mechanisms combine to confer strong DDT resistance in *Anopheles gambiae*.

- 990 PLoS One. 2014;9(3):e92662. doi: 10.1371/journal.pone.0092662. PubMed PMID:  
991 24675797; PubMed Central PMCID: PMC3968025.
- 992 45. Crawford JE, Guelbeogo WM, Sanou A, Traore A, Vernick KD, Sagnon N, et al. De  
993 novo transcriptome sequencing in *Anopheles funestus* using Illumina RNA-seq technology.  
994 PLoS One. 2010;5(12):e14202. Epub 2010/12/15. doi: 10.1371/journal.pone.0014202.  
995 PubMed PMID: 21151993; PubMed Central PMCID: PMC2996306.
- 996 46. Gregory R, Darby AC, Irving H, Coulibaly MB, Hughes M, Koekemoer LL, et al. A de  
997 novo expression profiling of *Anopheles funestus*, malaria vector in Africa, using 454  
998 pyrosequencing. PLoS One. 2011;6(2):e17418. Epub 2011/03/03. doi:  
999 10.1371/journal.pone.0017418. PubMed PMID: 21364769; PubMed Central PMCID:  
1000 PMC3045460.
- 1001 47. Hunt RH, Brooke BD, Pillay C, Koekemoer LL, Coetzee M. Laboratory selection for and  
1002 characteristics of pyrethroid resistance in the malaria vector *Anopheles funestus*. Med Vet  
1003 Entomol. 2005;19(3):271-5. PubMed PMID: 16134975.
- 1004 48. Mulamba C, Riveron JM, Ibrahim SS, Irving H, Barnes KG, Mukwaya LG, et al.  
1005 Widespread pyrethroid and DDT resistance in the major malaria vector *Anopheles funestus*  
1006 in East Africa is driven by metabolic resistance mechanisms. PLoS One. 2014;9(10):e110058.  
1007 doi: 10.1371/journal.pone.0110058. PubMed PMID: 25333491; PubMed Central PMCID:  
1008 PMC4198208.
- 1009 49. Riveron JM, Chiumia M, Menze BD, Barnes KG, Irving H, Ibrahim SS, et al. Rise of  
1010 multiple insecticide resistance in *Anopheles funestus* in Malawi: a major concern for malaria  
1011 vector control. Malar J. 2015;14:344. doi: 10.1186/s12936-015-0877-y. PubMed PMID:  
1012 26370361; PubMed Central PMCID: PMC4570681.
- 1013 50. Morgan JC, Irving H, Okedi LM, Steven A, Wondji CS. Pyrethroid resistance in an  
1014 *Anopheles funestus* population from Uganda. PLoS One. 2010;5(7):e11872. Epub  
1015 2010/08/06. doi: 10.1371/journal.pone.0011872. PubMed PMID: 20686697; PubMed  
1016 Central PMCID: PMC2912372.
- 1017 51. Gillies MT, Coetzee M. A supplement to the Anophelinae of Africa south of the  
1018 Sahara (Afrotropical region). Johannesburg: South African Institute for medical research;  
1019 1987. 143 p.
- 1020 52. Riveron JM, Osaie M, Egyir-Yawson A, Irving H, Ibrahim SS, Wondji CS. Multiple  
1021 insecticide resistance in the major malaria vector *Anopheles funestus* in southern Ghana:  
1022 implications for malaria control. Parasit Vectors. 2016;9(1):504. doi: 10.1186/s13071-016-  
1023 1787-8. PubMed PMID: 27628765; PubMed Central PMCID: PMC45024453.
- 1024 53. Li H, Durbin R. Fast and accurate short read alignment with Burrows-Wheeler  
1025 transform. Bioinformatics. 2009;25(14):1754-60. Epub 2009/05/20. doi:  
1026 10.1093/bioinformatics/btp324. PubMed PMID: 19451168; PubMed Central PMCID:  
1027 PMC1705234.
- 1028 54. Koboldt DC, Zhang Q, Larson DE, Shen D, McLellan MD, Lin L, et al. VarScan 2:  
1029 somatic mutation and copy number alteration discovery in cancer by exome sequencing.  
1030 Genome Res. 2012;22(3):568-76. Epub 2012/02/04. doi: 10.1101/gr.129684.111. PubMed  
1031 PMID: 22300766; PubMed Central PMCID: PMC3290792.
- 1032 55. Danecek P, Bonfield JK, Liddle J, Marshall J, Ohan V, Pollard MO, et al. Twelve years  
1033 of SAMtools and BCFtools. Gigascience. 2021;10(2). Epub 2021/02/17. doi:  
1034 10.1093/gigascience/giab008. PubMed PMID: 33590861; PubMed Central PMCID:  
1035 PMC7931819.

- 1036 56. Wickham H. *ggplot2: Elegant Graphics for Data Analysis.*: Springer-Verlag New York;  
1037 2016.
- 1038 57. Hall TA. BioEdit: a user-friendly biological sequence alignment editor and analysis  
1039 program for Windows 95/98/NT. . *Nucl Acids Symp Ser* 41:95-98 1999.
- 1040 58. Librado P, Rozas J. DnaSP v5: a software for comprehensive analysis of DNA  
1041 polymorphism data. *Bioinformatics*. 2009;25(11):1451-2. Epub 2009/04/07. doi: [btp187](#) [pii]  
1042 [10.1093/bioinformatics/btp187](#). PubMed PMID: 19346325.
- 1043 59. Kumar S, Stecher G, Li M, Knyaz C, Tamura K. MEGA X: Molecular Evolutionary  
1044 Genetics Analysis across Computing Platforms. *Mol Biol Evol*. 2018;35(6):1547-9. Epub  
1045 2018/05/04. doi: [10.1093/molbev/msy096](#). PubMed PMID: 29722887; PubMed Central  
1046 PMCID: [PMCPMC5967553](#).
- 1047 60. Pritchard MP, Ossetian R, Li DN, Henderson CJ, Burchell B, Wolf CR, et al. A general  
1048 strategy for the expression of recombinant human cytochrome P450s in *Escherichia coli*  
1049 using bacterial signal peptides: expression of CYP3A4, CYP2A6, and CYP2E1. *Arch Biochem*  
1050 *Biophys*. 1997;345(2):342-54. Epub 1997/10/06. doi: [S0003-9861\(97\)90265-4](#) [pii]  
1051 [10.1006/abbi.1997.0265](#). PubMed PMID: 9308909.
- 1052 61. Pritchard MP, McLaughlin L, Friedberg T. Establishment of functional human  
1053 cytochrome P450 monooxygenase systems in *Escherichia coli*. *Methods Mol Biol*.  
1054 2006;320:19-29. doi: [10.1385/1-59259-998-2:19](#). PubMed PMID: 16719371.
- 1055 62. Omura T, Sato R. The Carbon Monoxide-Binding Pigment of Liver Microsomes. I.  
1056 Evidence for Its Hemoprotein Nature. *J Biol Chem*. 1964;239:2370-8. Epub 1964/07/01.  
1057 PubMed PMID: 14209971.
- 1058 63. Strobel HW, Dignam JD. Purification and properties of NADPH-cytochrome P-450  
1059 reductase. *Methods Enzymol*. 1978;52:89-96. Epub 1978/01/01. PubMed PMID: 209290.
- 1060 64. Mitchell SN, Stevenson BJ, Muller P, Wilding CS, Egyir-Yawson A, Field SG, et al.  
1061 Identification and validation of a gene causing cross-resistance between insecticide classes  
1062 in *Anopheles gambiae* from Ghana. *Proc Natl Acad Sci U S A*. 2012;109(16):6147-52. doi:  
1063 [10.1073/pnas.1203452109](#). PubMed PMID: 22460795; PubMed Central PMCID:  
1064 [PMC3341073](#).
- 1065
- 1066

1067 **Figure Legends**

1068

1069 **Figure 1. PoolSeq genome-wide analysis between pools of permethrin resistant**  
1070 **and susceptible *An. funestus* from Malawi and Cameroon.** a) Cochran-Mantel-  
1071 Haenszel test  $-\log_{10}$  P-values per SNP calculated in Popoolation 2 in Malawi, b)  $F_{st}$   
1072 values for 1000 bp windows calculated in poolfstat in Malawi and c) is for Cameroon.

1073

1074 **Figure 2. Variants significantly associated with permethrin resistance using**  
1075 **SureSelect target enrichment sequencing of specific candidate resistance**  
1076 **genomic regions.** Using a frequency-based filtering approach implemented in  
1077 StrandNGS, (a) sets of SNPs significantly associated with resistance were detected in  
1078 various comparisons between field Permethrin Alive (R) and dead (C) and the lab  
1079 susceptible strain FANG (S) in Cameroon. (b) Distribution of the significant SNPs  
1080 between non-Synonymous (Nsyn), Splice Sites (SpS), Synonymous (Syn), intron (Int),  
1081 5'untranslated region (5'UTR) and 3' Untranslated regions (3'UTR) in Cameroon. (b)  
1082 List of genes with variants significantly associated with permethrin resistance in  
1083 Cameroon. (d), (e), (f) are equivalent of (a), (b) and (c) for Uganda respectively, as are  
1084 (g), (h) and (i) for Malawi.

1085

1086 **Figure 3. Variants significantly associated with permethrin resistance using an**  
1087 **unpaired t-test between the resistant mosquitoes (alive) and susceptible (Dead).**  
1088 (a) Significant variants between permethrin resistant and susceptible mosquitoes in  
1089 Cameroon (unpaired t-test); whereas (b) is between Cameroon resistant and FANG  
1090 susceptible strain. (c) is for Uganda Alive and Dead mosquitoes after permethrin  
1091 exposure while (d) are the significant SNPs between the Uganda Alive and the lab



1092 susceptible strain (FANG) and (e and f) are for significant SNPs between Malawi Alive  
1093 and Dead mosquitoes and versus FANG respectively. SNPs located in the rp1 QTL  
1094 resistance regions on the 2R chromosomes are consistently associated with  
1095 pyrethroid resistance. Similarly, a cluster of ABC transporter genes including ABCG4.  
1096 The black dotted line indicates multiple testing significance level ( $P=5 \times 10^{-5}$ ) for R-C  
1097 comparisons and ( $P=5 \times 10^{-22}$ ) for comparisons with FANG susceptible strain.

1098

1099 **Figure 4. Metabolism of insecticides by recombinant *An. funestus* CYP9K1.** a)  
1100 CO-difference spectrum generated from *E. coli* membranes expressing CYP9K1. b)  
1101 Percentage depletion of various insecticides (20 $\mu$ M) with recombinant CYP9K1;  
1102 results are average of 3 replicates compared with negative control (-NADPH); \*\*\*  
1103 Significantly different from -NADPH at  $p < 0.005$ . c) Overlay of HPLC chromatogram of  
1104 the CYP9K1 metabolism of deltamethrin, with -NADPH in pink and +NADPH in blue

1105

1106 **Figure 5. Polymorphisms patterns of CYP9K1 in Africa.** a) Plot of genetic diversity  
1107 parameters of *CYP9K1* across Africa showing the signature of a strong directional  
1108 selection of *CYP9K1* in Uganda. H is for haplotype while S is the number of  
1109 polymorphic sites. b) Phylogenetic tree for *CYP9K1* full-length (2707bp) between Fang  
1110 and resistant strains of Uganda, Cameroon, Malawi and FUMOZ using SureSelect  
1111 data.

1112

### 1113 **Supplementary Tables**

1114

1115 **Table S1.** Descriptive statistics of PoolSeq sequence read data and alignments of  
1116 permethrin-resistant and susceptible mosquitoes from Malawi and Cameroon.

1117

1118 **Table S2.** Descriptive statistics of SureSelect sequence read data for FANG colony  
1119 mosquitoes and permethrin-resistant and susceptible mosquitoes from Cameroon,  
1120 Uganda and Malawi.

1121

1122 **Table S3.** Mapping metrics of the targeted sequencing relative to the reference  
1123 genome.

1124

1125 **Table S4.** Coverage metrics of the targeted sequencing relative to the reference  
1126 genome

1127

1128 **Table S5.** Summary of significant SNPs detected between the permethrin resistant  
1129 (R) and field dead mosquitoes (C) (R-C) in Cameroon, Malawi and Uganda.

1130

1131 **Table S6.** Significant SNPs between Malawi and FANG.

1132

1133 **Tables S7.** List of SNPs significant between the permethrin resistant (R) and field  
1134 dead mosquitoes (C) (R-C) in Cameroon using

1135

1136 **Table S8.** List of the most significant SNPs between the permethrin resistant (R)  
1137 mosquitoes in Cameroon and the susceptible lab strain FANG.

1138

1139 **Tables S9.** List of SNPs significant between the permethrin resistant (R) and field  
1140 dead mosquitoes (C) (R-C) in Uganda.

1141

1142 **Table S10.** List of the most significant SNPs between the permethrin resistant (R)  
1143 mosquitoes in Uganda and the susceptible lab strain FANG.

1144

1145 **Tables S11.** List of SNPs significant between the permethrin resistant (R) and field  
1146 dead mosquitoes (C) (R-C) in Malawi.

1147

1148 **Table S12.** List of the most significant SNPs between the permethrin resistant (R)  
1149 mosquitoes in Malawi and the susceptible lab strain FANG.

1150

1151 **Table S13.** Genetic diversity parameters of the Coding sequences of the *CYP9K1* full  
1152 sequence (2,707bp) using SureSelect enrichment sequencing.

1153

1154 **Table S14.** Genetic diversity parameters of the Coding sequences only of *CYP9K1*  
1155 (1,614bp) using SureSelect enrichment sequencing.

1156

1157 **Table S15.** Genetic diversity parameters of the noncoding sequences only of *CYP9K1*  
1158 (introns and UTR; 1,093bp) using SureSelect enrichment sequencing.

1159

1160 **Table S16.** Primers used for the cloning of *CYP9K1* for the heterologous expression  
1161 in *E. coli*.

1162

### 1163 **Supplementary Figures**

1164

1165 **Figure S1. Pairwise  $F_{st}$  between all Malawi replicates from 1000 bp non-**  
1166 **overlapping sliding windows. a-f) All combinations of resistant (Alive) versus**

1167 susceptible (Dead) mosquitoes and g-j) resistant versus resistant and susceptible  
1168 versus susceptible comparisons.

1169 **Figure S2. Crude PoolSeq GWAS all Malawi and Cameroon replicates.** a)  
1170 Cochran- Mantel-Haenszel test  $-\log_{10}$  P-values per SNP calculated in Popoolation 2,  
1171 b)  $F_{st}$  values for 1000 bp windows calculated in poolfst. SNPs overlapping the *rp1*  
1172 resistance locus containing the *CYP6P9a/b* cytochrome P450 genes are circled in red.

1173 **Figure S3. Quality control of targeted sequencing:** (A) Average base quality of the  
1174 reads for one mosquito from Malawi showing the distribution of the base quality score  
1175 across bases of all reads. (B) alignment score of the mapped reads showing the  
1176 distribution of reads based on their alignment score. (C) Pie-chart displaying the match  
1177 status of paired ended reads. This represents the proportion of reads with different  
1178 read statuses for paired data. (D) The IGV screen showing an overview of the  
1179 coverage of the some of the targeted genomic regions after SureSelect target  
1180 enrichment and sequencing.

1181 **Figure S4. Haplotype network for *CYP9K1* full sequence (2,707bp) using sure  
1182 select data.** a) Alive and dead per population and, b) pooled alive and dead per  
1183 population.

1184 **Figure S5. Haplotype networks for *CYP9K1* coding sequence (1,614bp) using  
1185 sure select data.** a) Alive and dead per population and, b) pooled alive and dead per  
1186 population.

1187 **Figure S6. Haplotype networks for *CYP9K1* noncoding sequence (1,093bp)  
1188 using SureSelect data.** a) Alive and dead per population. b) Pooled alive and dead  
1189 per population.

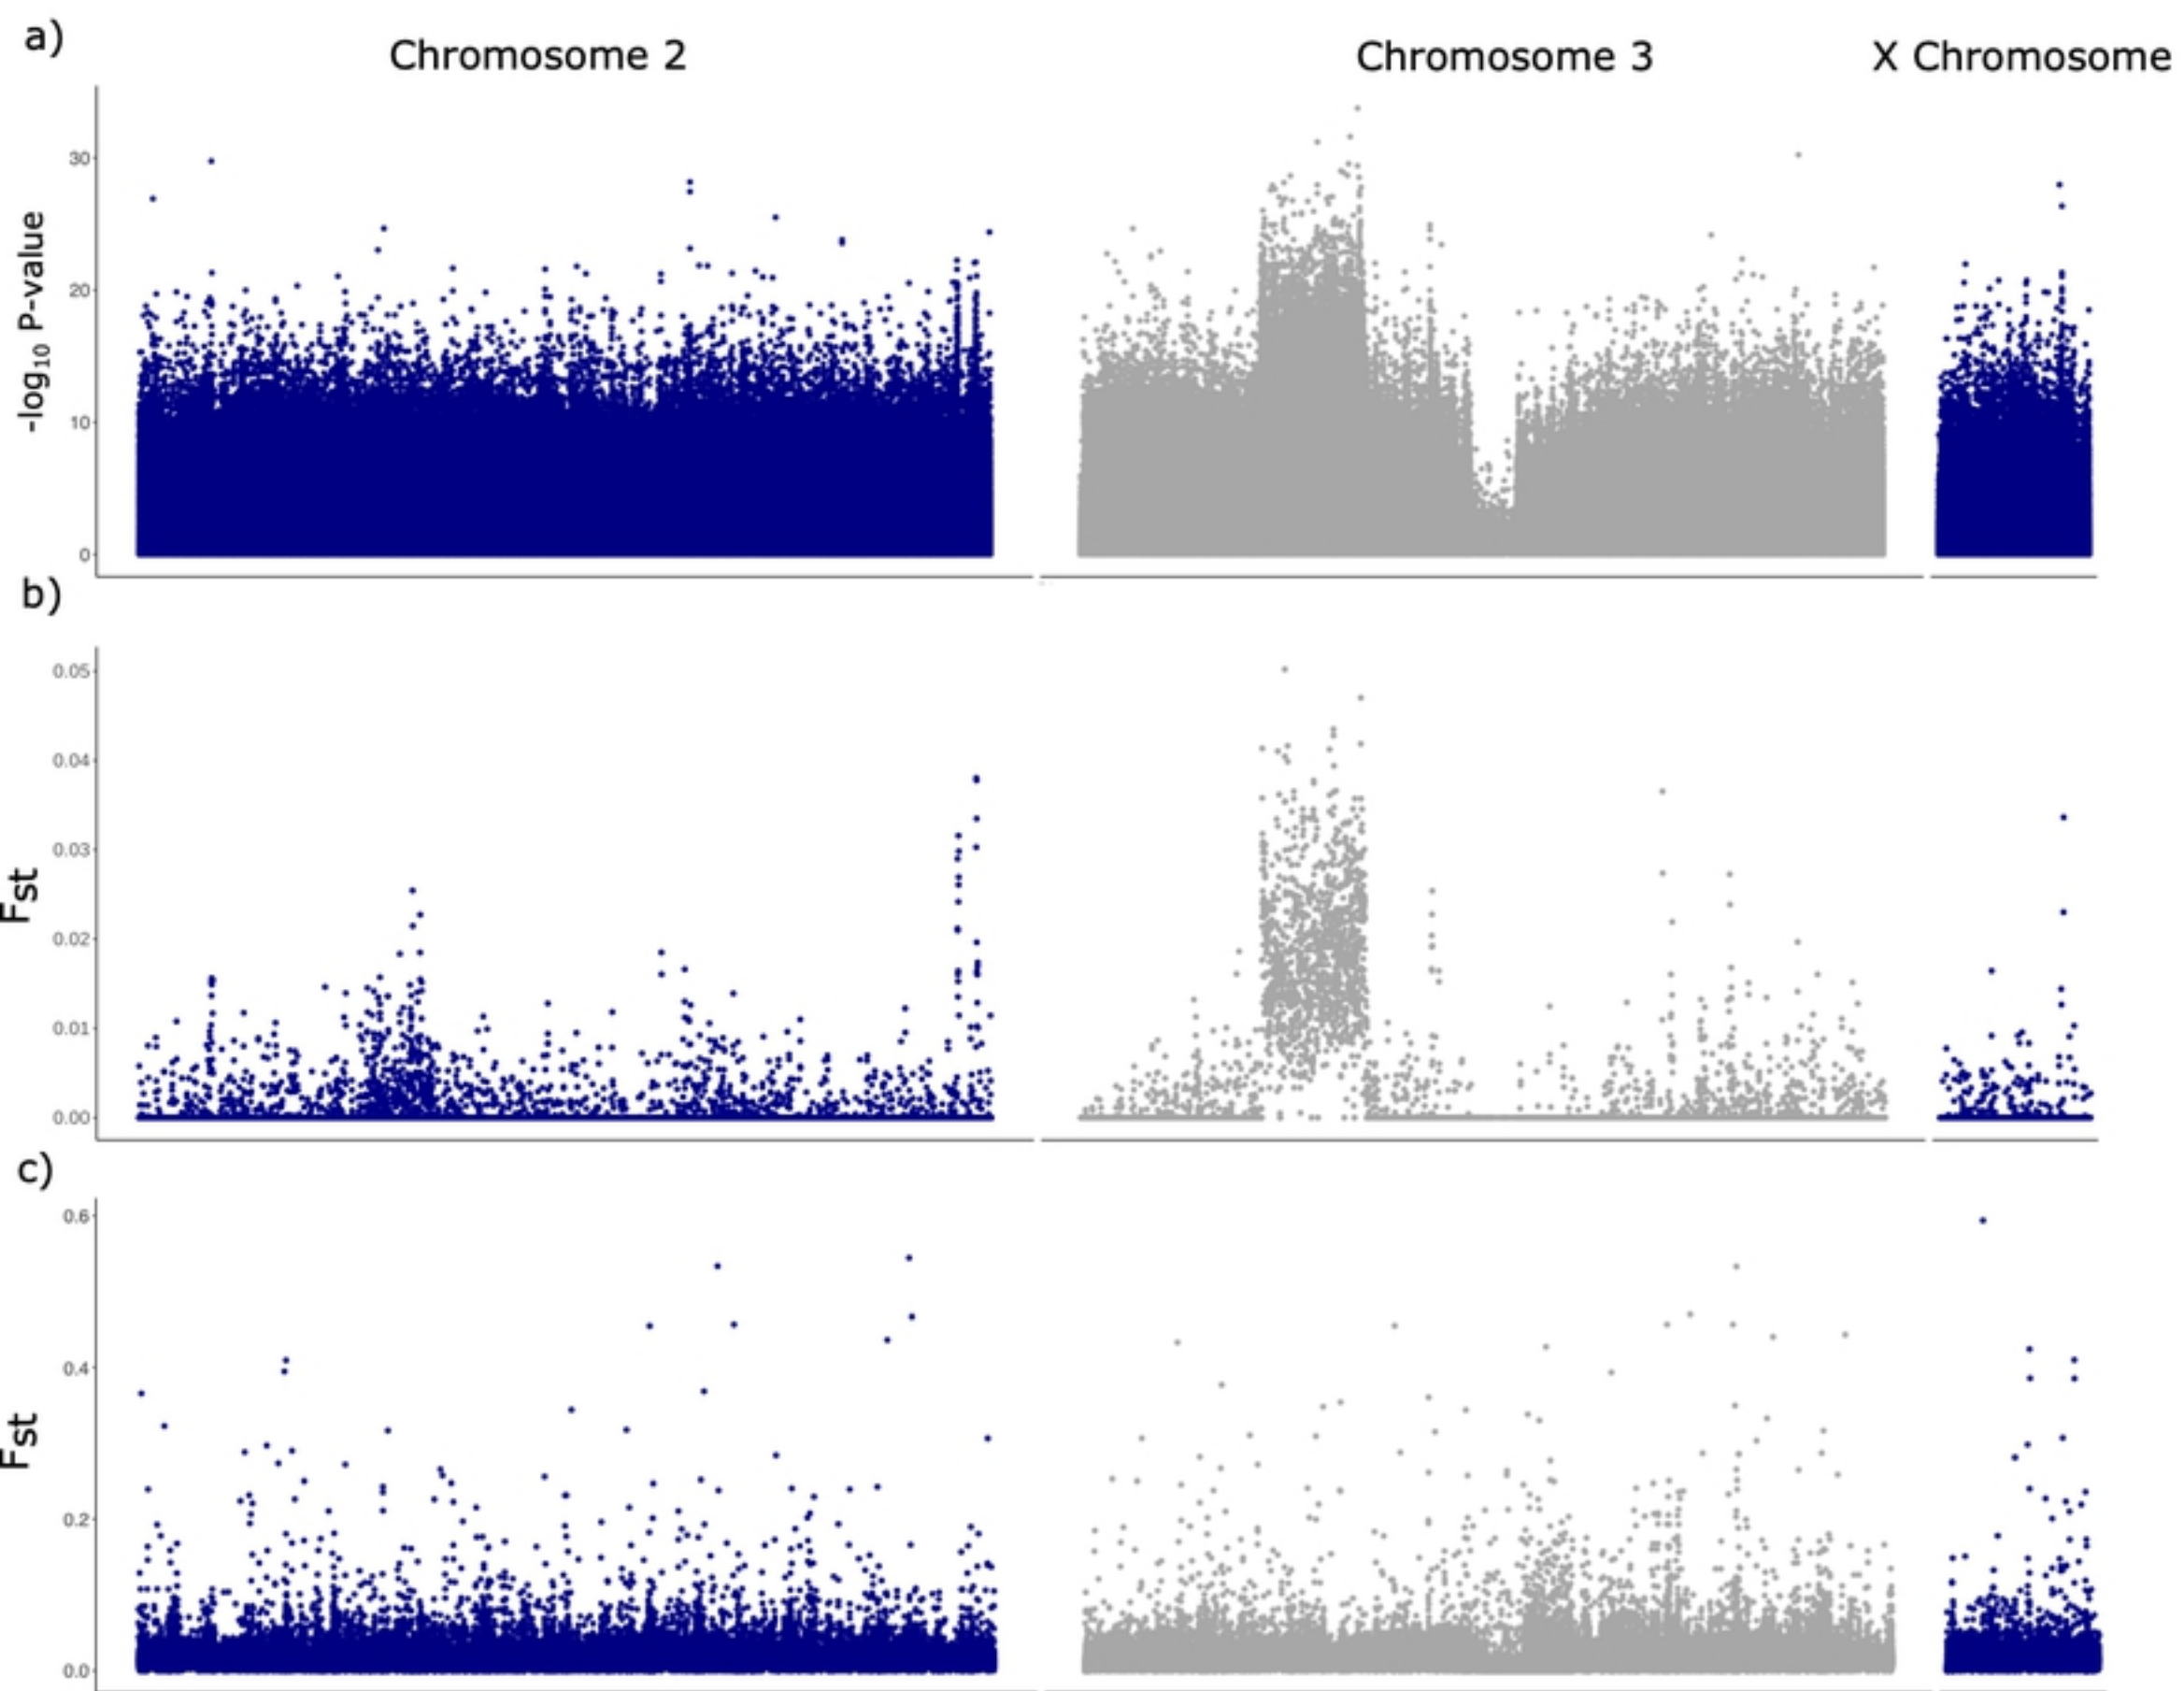

Fig1.

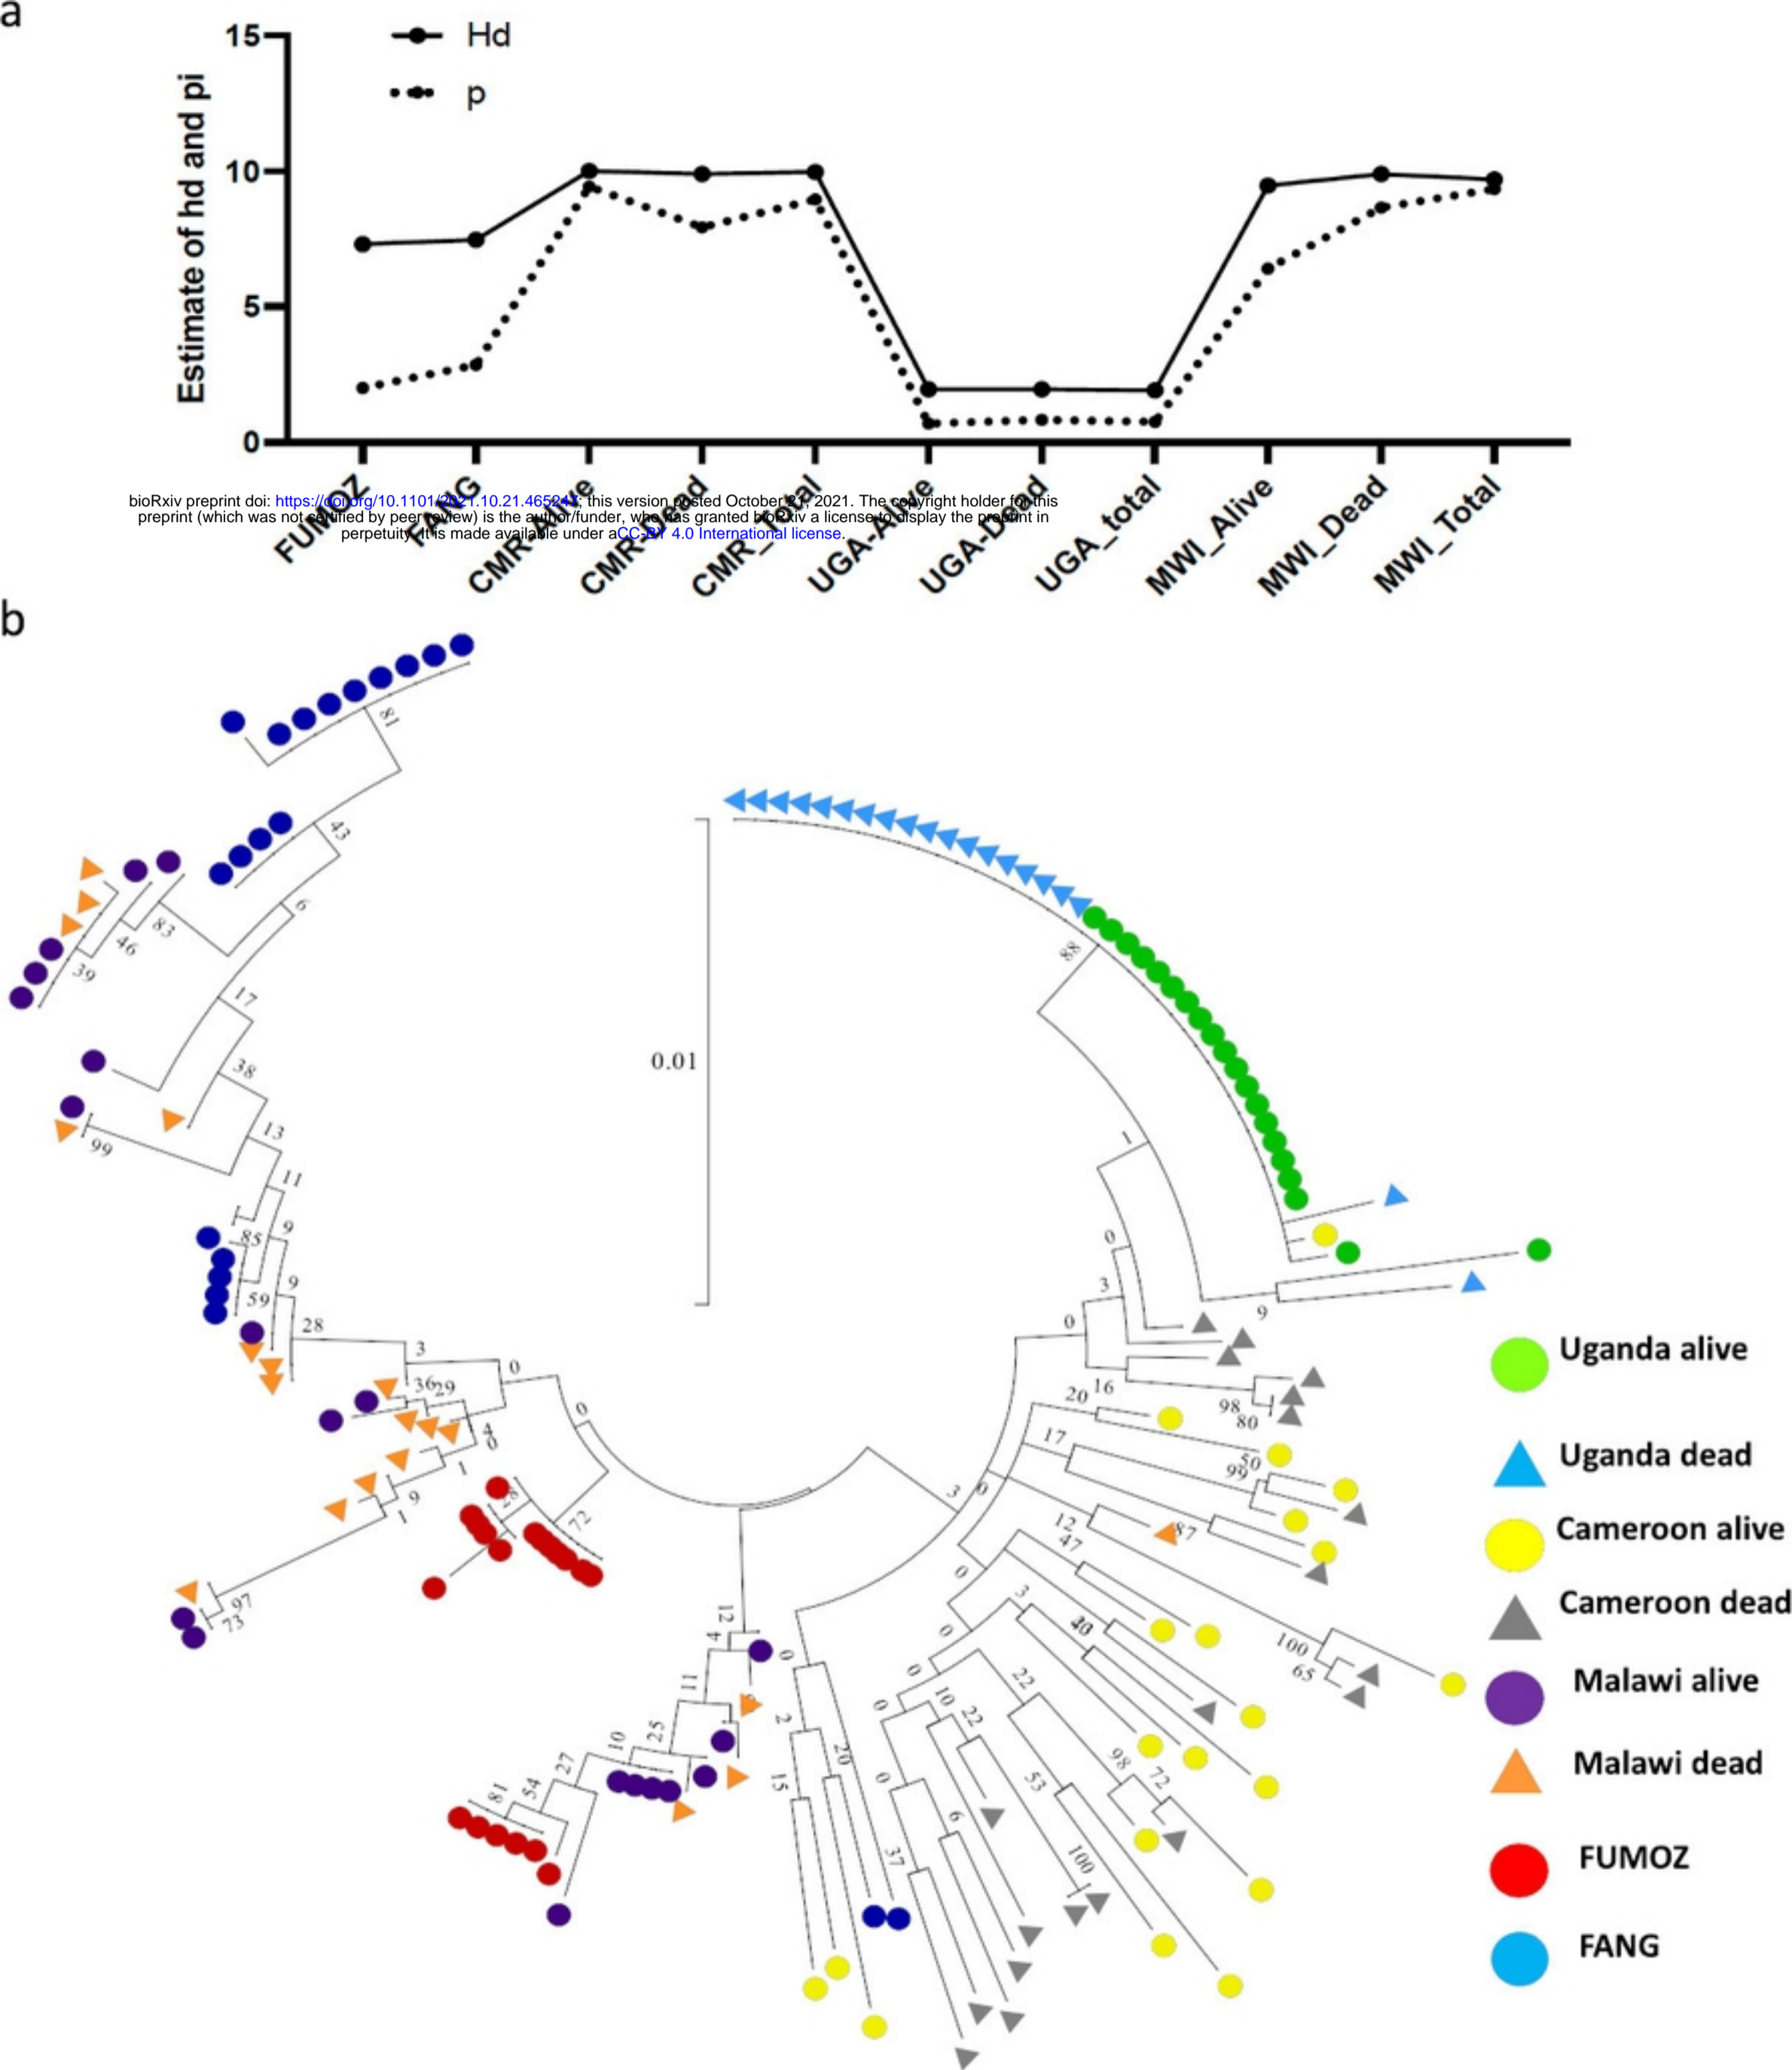

Fig5.

a

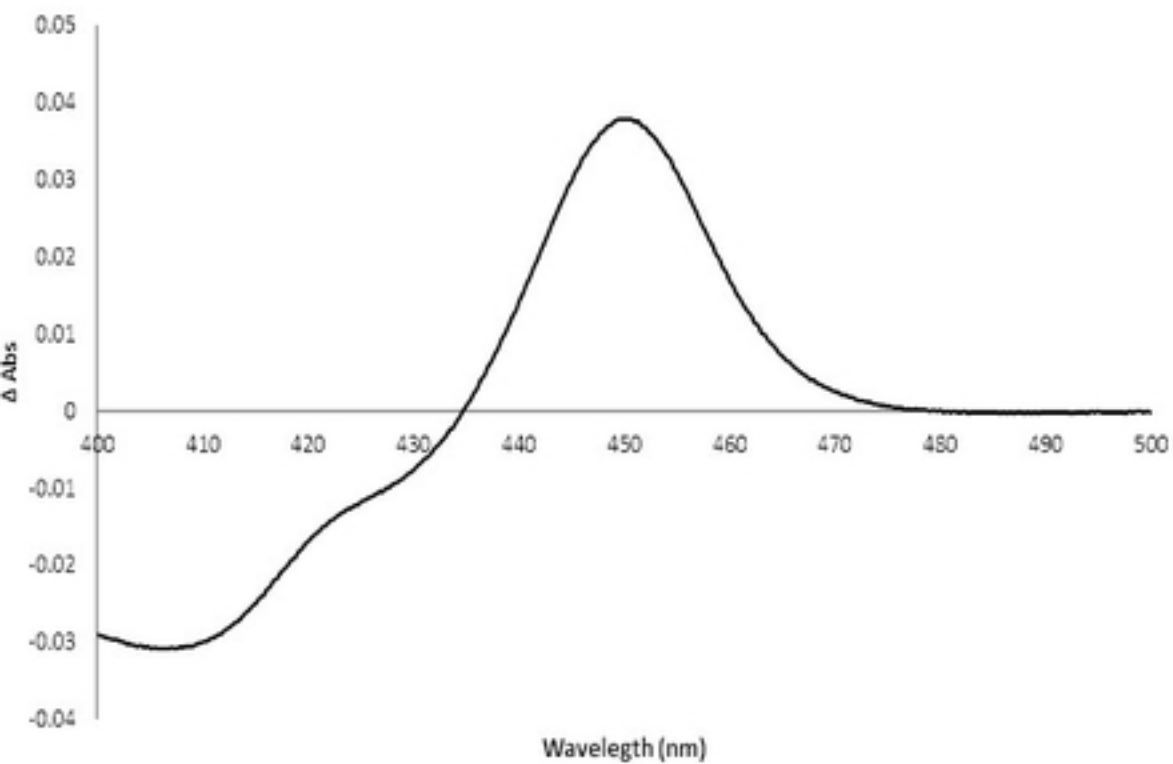

b

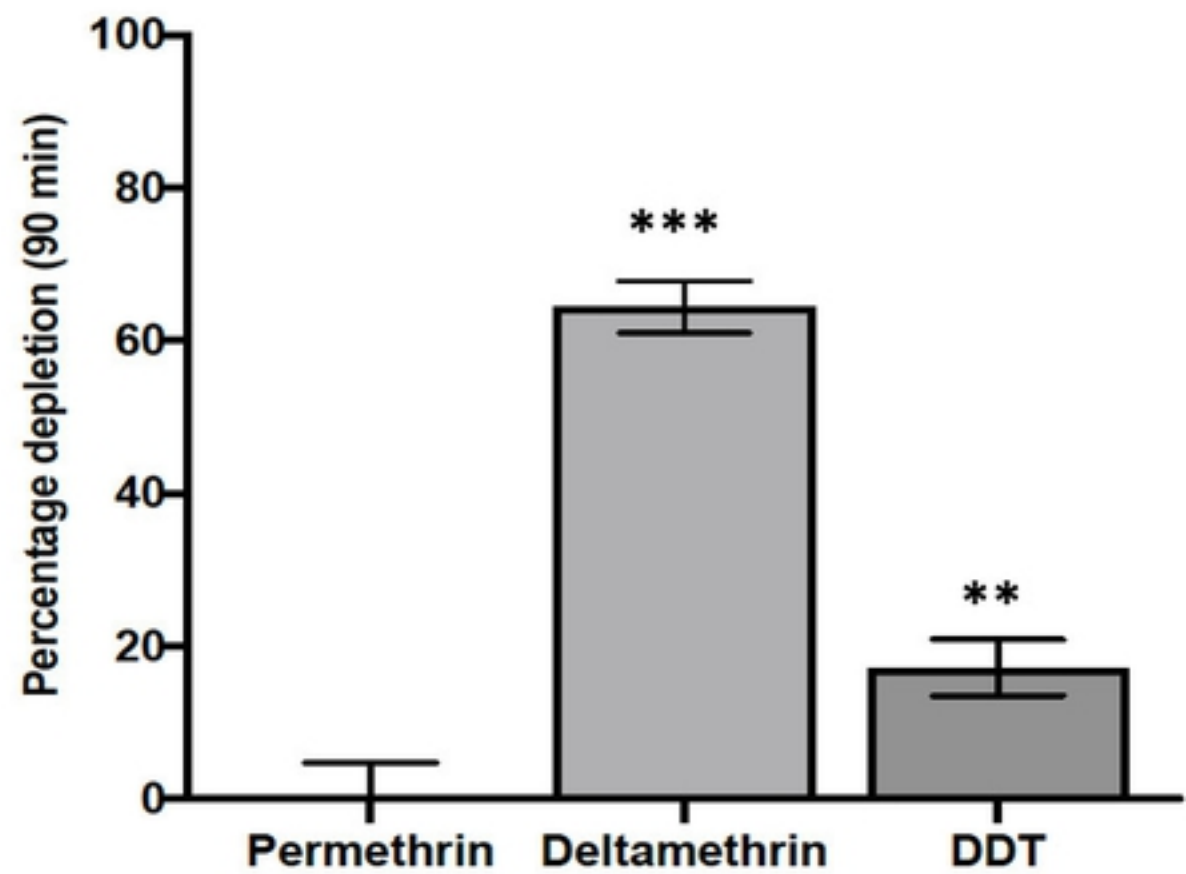

c

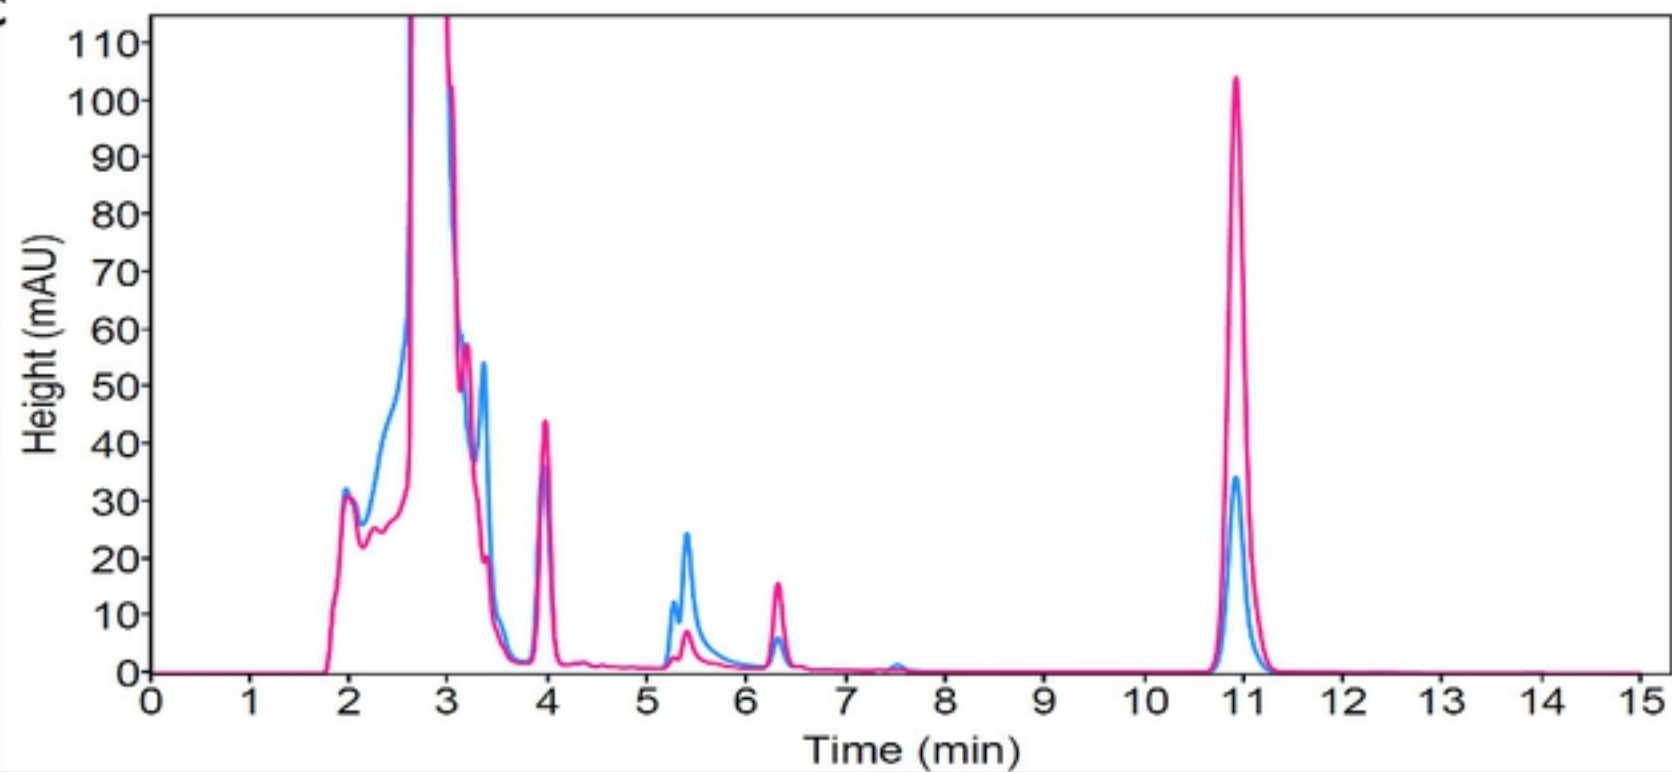

Fig4.

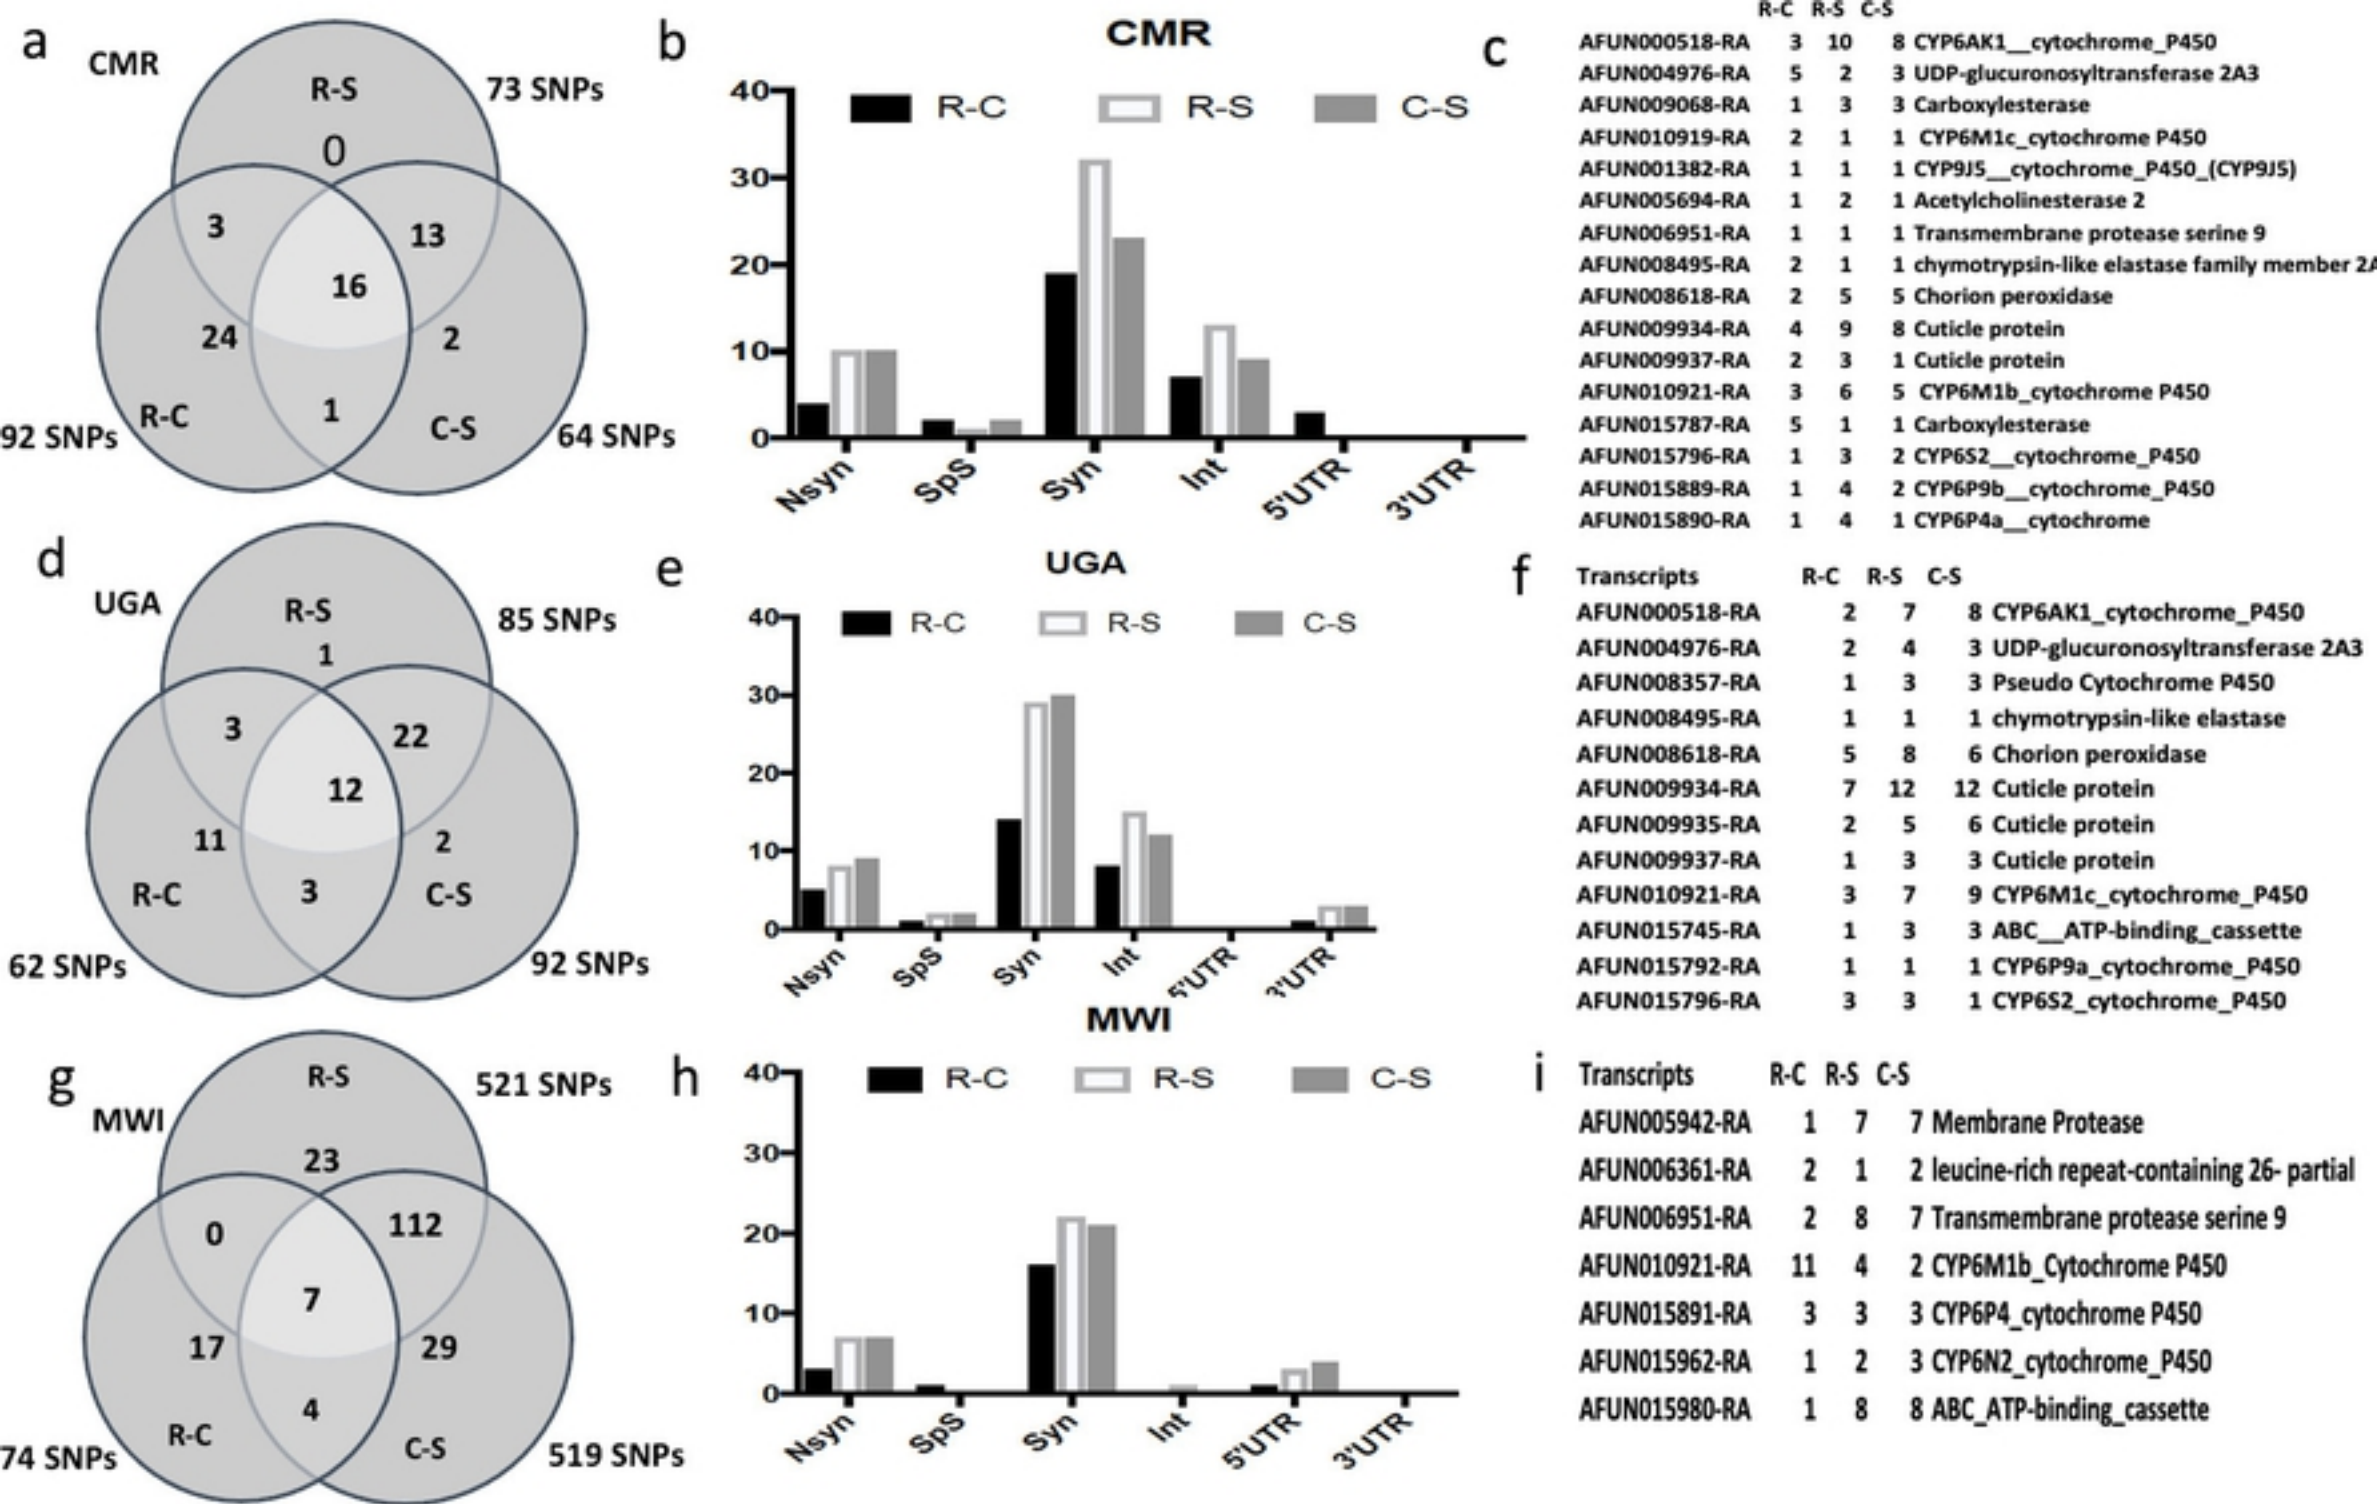

Fig2.



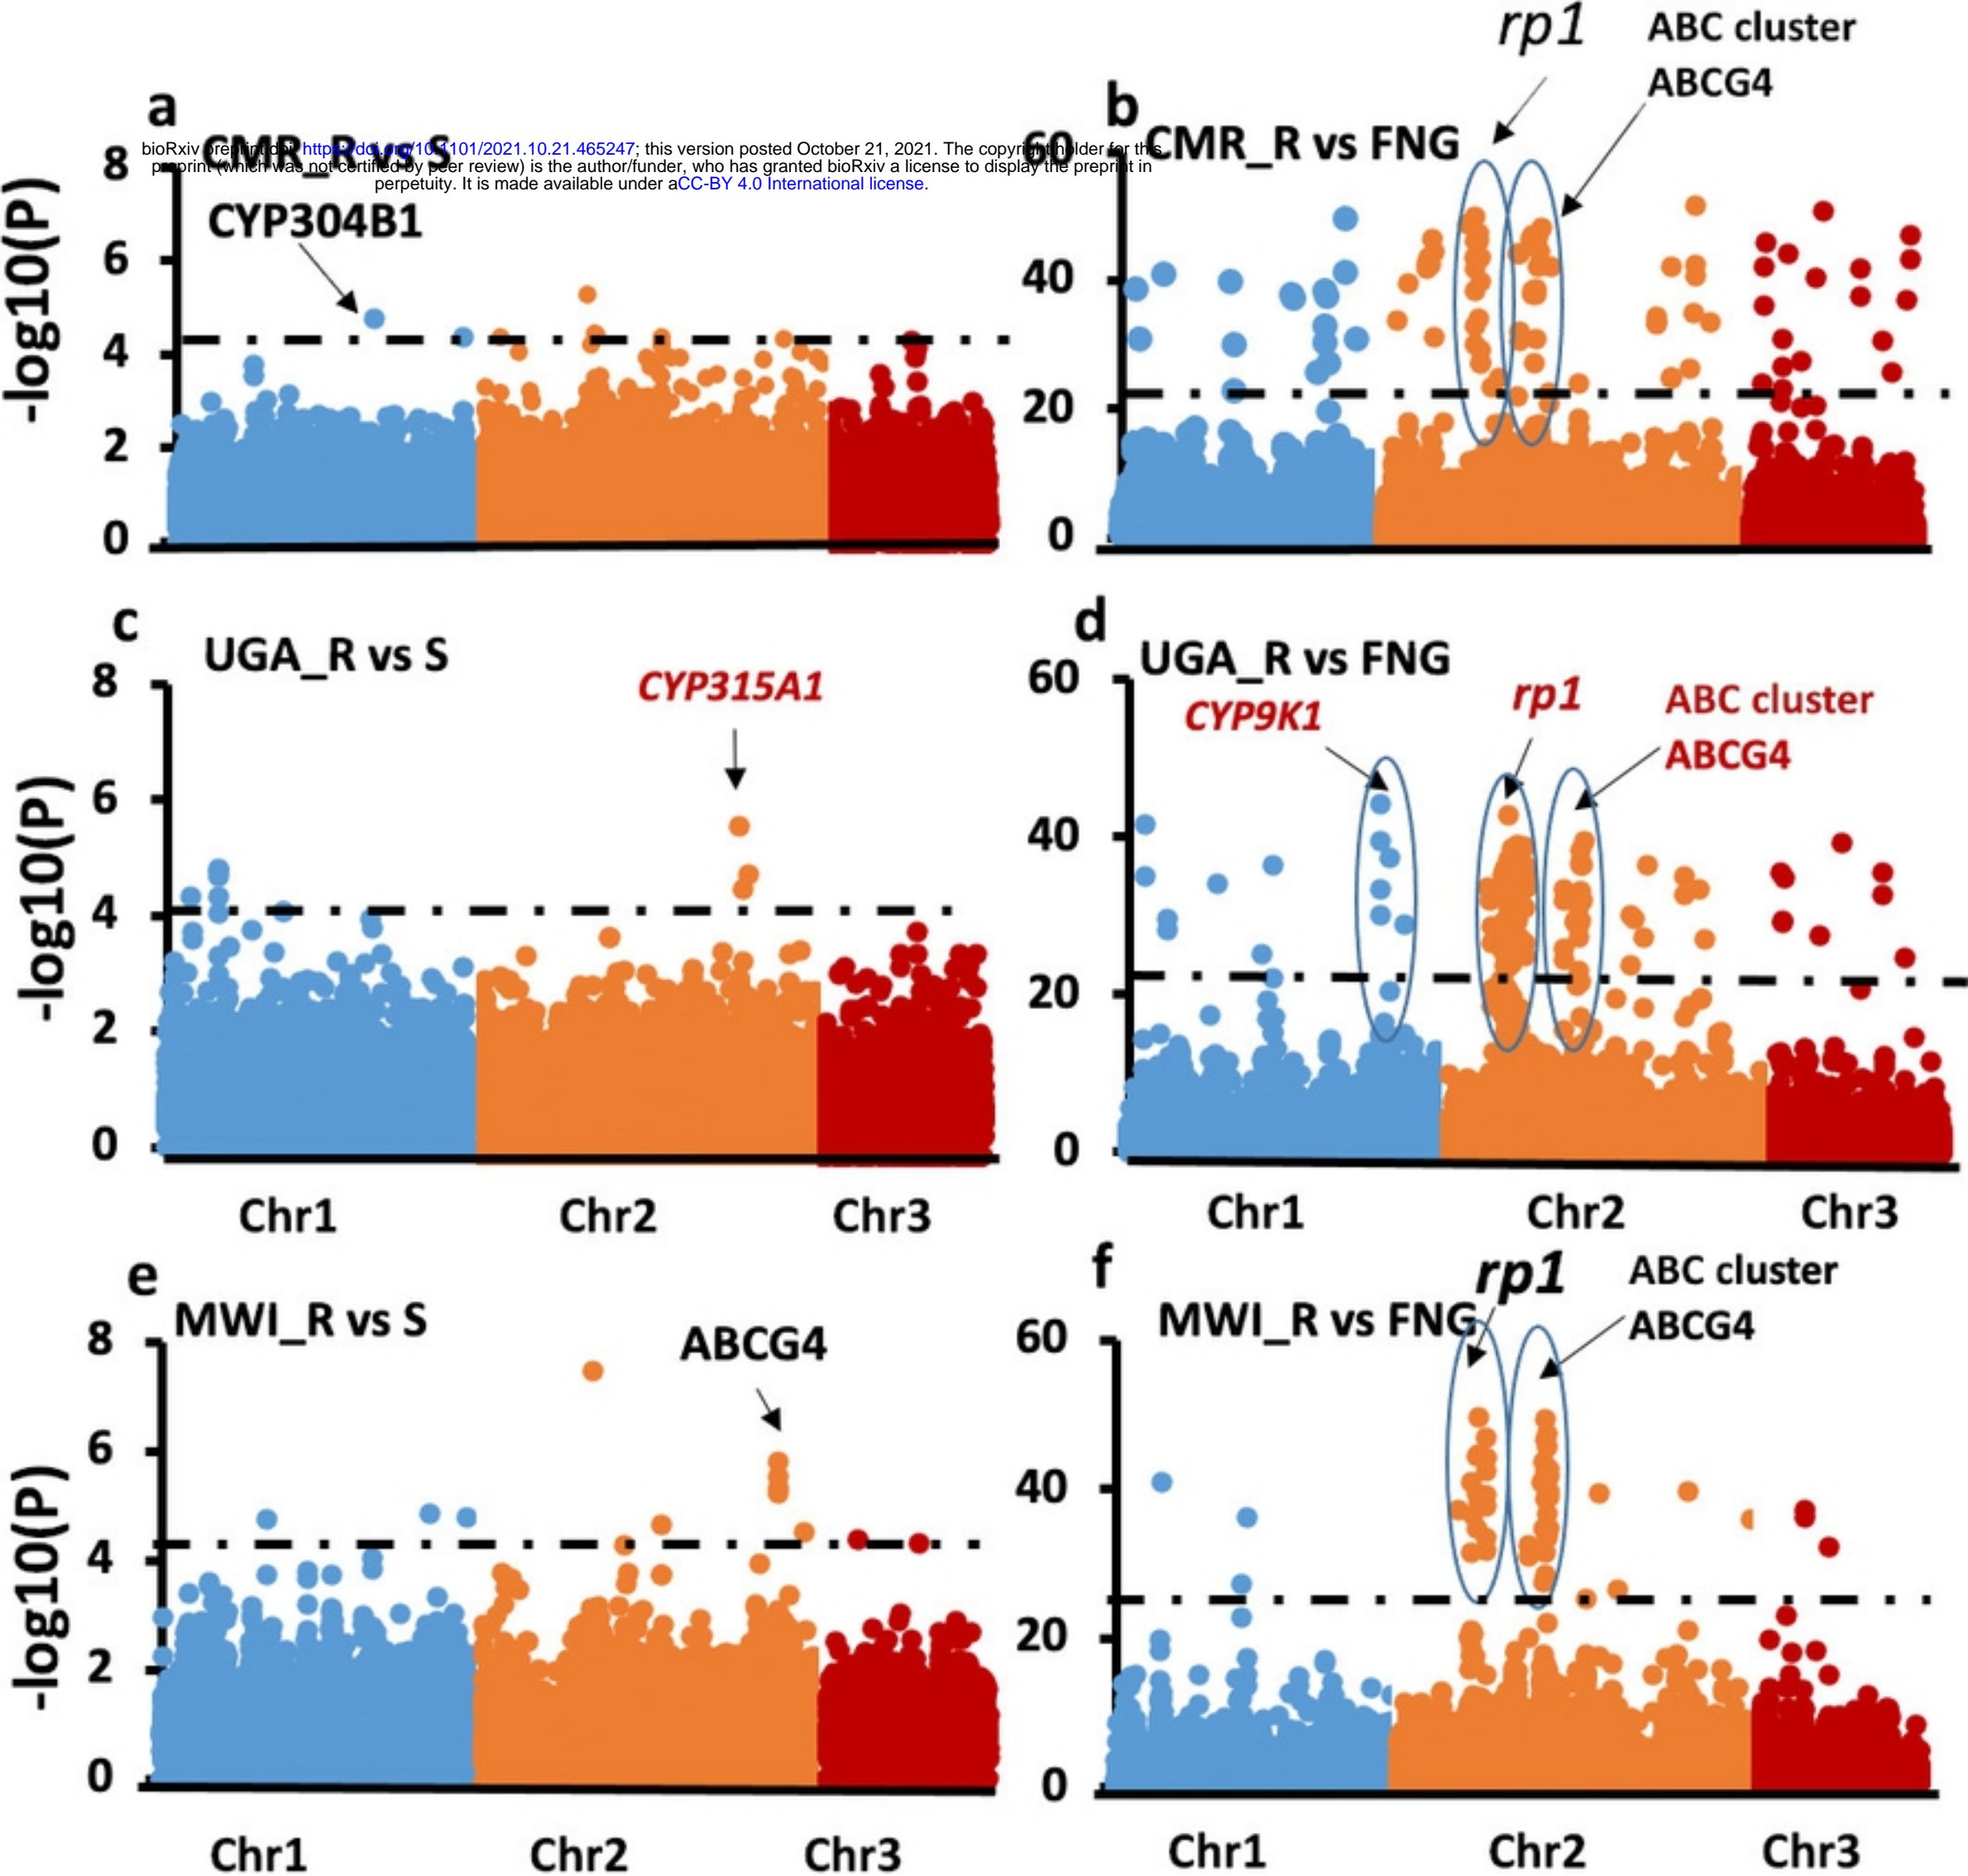

Fig3.
